# Supplementary material for: A Drosophila functional evaluation of candidates from human genome-wide association studies of type 2 diabetes and related metabolic traits identifies tissue-specific roles for dHHEX
Source: PubMed Central journal article supplement (PMC3608171; doi:10.1186/1471-2164-14-136), 2013-02-27
Supplement: 1471-2164-14-136-S1.pdf [file 1471-2164-14-136-S1.pdf]

## Supplementary material for

Pendse J, Ramachandran PV, Na J, Narisu N, Fink JL, Cagan RL, Collins FS, and Baranski TJ:  
A *Drosophila* functional evaluation of candidates from human genome-wide association studies of type 2 diabetes and related metabolic traits identifies tissue-specific roles for dHHEX.

**Figure S1.** Wild type flies tolerate up to 1.25 M dietary sucrose.

**Table S1.** RNAi screen for sucrose sensitivity: knockdowns.

**Table S2.** RNAi screen for sucrose sensitivity: controls.

**Table S3.** Diet survey. Ubiquitous dHHEX knockdown results in intolerance to sugar and salt but not other stressors.

**Table S4.** Driver survey, part 1. Knockdown of dHHEX in the tubP or esg domains results in sucrose intolerance.

**Table S5.** Driver survey, part 2. Knockdown of dHHEX in the Dot domain results in sucrose intolerance.

**Table S6.** Cg>RNAi<sup>dHHEX-V15721</sup>, Dcr-2 larvae are hyperglycemic.

**Table S7.** Cg>RNAi<sup>dHHEX-V15721</sup>, Dcr-2 flies have reduced body mass.

**Table S8.** Cg>RNAi<sup>dHHEX-V15721</sup>, Dcr-2 flies have reduced triglyceride levels.

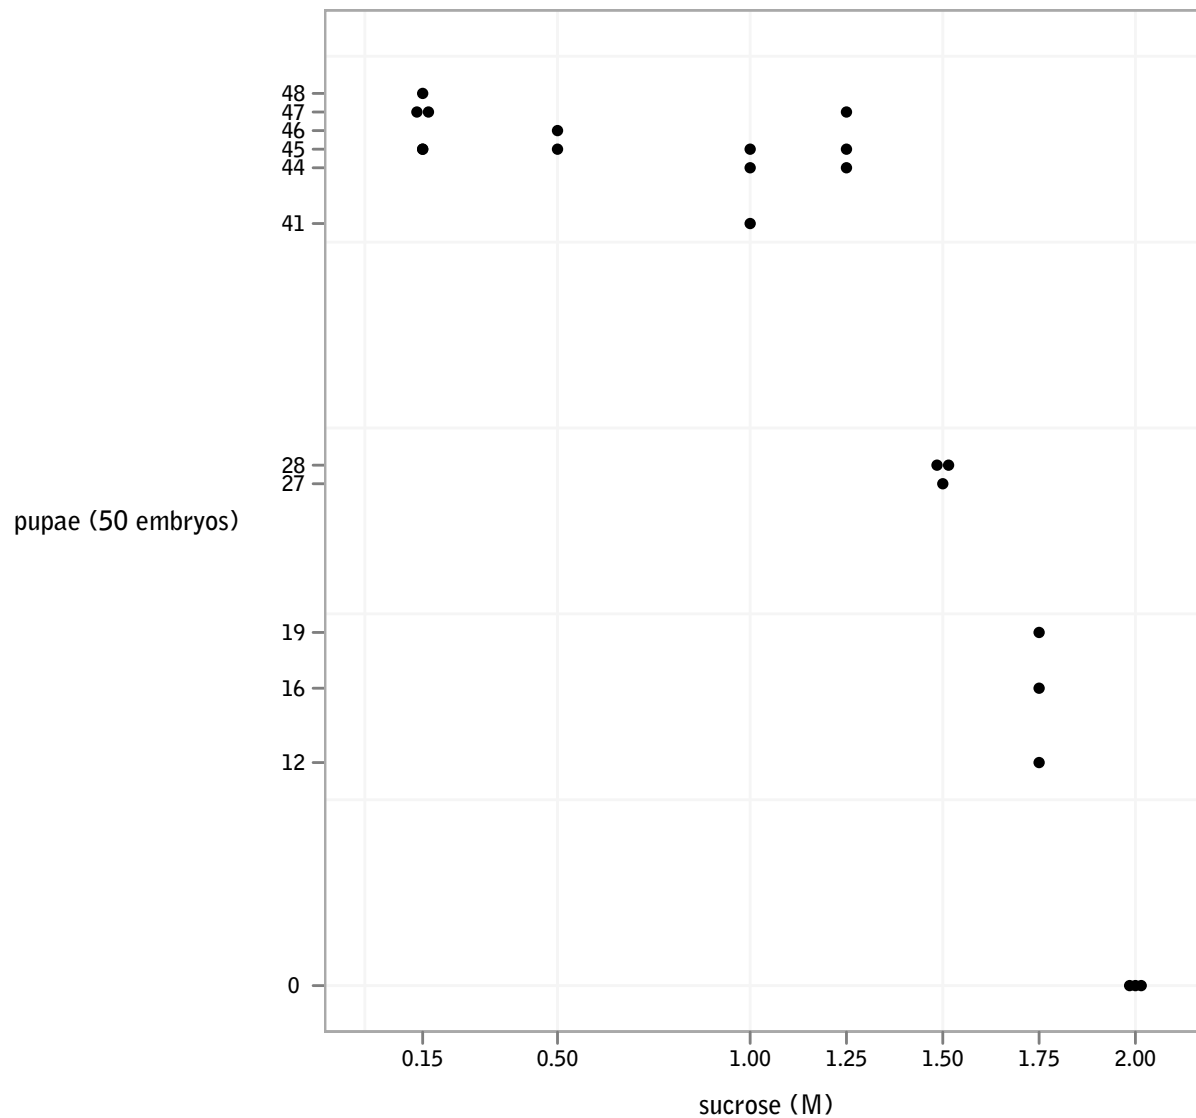

**Figure S1. Wild type flies tolerate up to 1.25 M dietary sucrose.** Survival to pupariation of  $w^{1118}$  flies reared with different levels of dietary sucrose, starting from 50 embryos per trial. Survival is comparable on 0.15 M, 1.0 M, and 1.25 M sucrose, but it decreases in a dose-dependent manner on 1.5 M and 1.75 M sucrose, and no pupae are seen on 2.0 M sucrose.

Table S1 – RNAi screen  
(data associated with Figures 1–2)

| Locus                                                                                    | Human Gene                               | Fly Gene                      | Insertion     | scoring: $tub_p > RNAi$ |            |                |            | ln(OR)         | confidence interval bounds |         |            |         | p-value           |                   |     |
|------------------------------------------------------------------------------------------|------------------------------------------|-------------------------------|---------------|-------------------------|------------|----------------|------------|----------------|----------------------------|---------|------------|---------|-------------------|-------------------|-----|
|                                                                                          |                                          |                               |               | 1.0 M sucrose           |            | 0.15 M sucrose |            |                | 95%                        |         | Bonferroni |         |                   |                   |     |
|                                                                                          |                                          |                               |               | RNAi                    | control    | RNAi           | control    |                | lower                      | upper   | lower      | upper   |                   |                   |     |
| <b>1p32.3</b><br>low-density lipoprotein<br>Willer: rs11206510<br>Kathiresan: rs11591147 | <b>TMEM61</b><br>(no ortholog)           |                               |               |                         |            |                |            |                |                            |         |            |         |                   |                   |     |
|                                                                                          | <b>BSND</b><br>(no ortholog)             |                               |               |                         |            |                |            |                |                            |         |            |         |                   |                   |     |
|                                                                                          | <b>PCSK9</b><br>(no ortholog)            |                               |               |                         |            |                |            |                |                            |         |            |         |                   |                   |     |
|                                                                                          | <b>USP24</b><br>(no ortholog)            |                               |               |                         |            |                |            |                |                            |         |            |         |                   |                   |     |
| <b>1p31.3</b><br>triglyceride<br>Willer: rs1748195<br>Kathiresan: rs12130333             | <b>ANGPTL3</b><br>(many-to-one ortholog) | <b>CG9593</b>                 | <b>V24164</b> | <b>108</b>              | <b>110</b> | <b>112</b>     | <b>104</b> | <b>-0.0922</b> | -0.4866                    | 0.3016  | -0.7862    | 0.5999  | <b>6.3276E-01</b> |                   |     |
|                                                                                          |                                          |                               |               | 28                      | 21         | 25             | 23         |                |                            |         |            |         |                   |                   |     |
|                                                                                          |                                          |                               |               | 72                      | 80         | 50             | 41         |                |                            |         |            |         |                   |                   |     |
|                                                                                          |                                          |                               |               |                         | 8          | 9              | 37         | 40             |                            |         |            |         |                   |                   |     |
|                                                                                          |                                          |                               |               | <b>V24165</b>           | <b>154</b> | <b>228</b>     | <b>310</b> | <b>319</b>     | <b>-0.3634</b>             | -0.6298 | -0.0984    | -0.8360 | 0.1040            | <b>6.2409E-03</b> |     |
|                                                                                          |                                          |                               |               | 29                      | 48         | 48             | 47         |                |                            |         |            |         |                   |                   |     |
|                                                                                          |                                          |                               |               | 82                      | 119        | 103            | 103        |                |                            |         |            |         |                   |                   |     |
|                                                                                          |                                          |                               |               | <b>V105528</b>          | <b>400</b> | <b>490</b>     | <b>301</b> | <b>289</b>     | <b>-0.2434</b>             | -0.4577 | -0.0295    | -0.6235 | 0.1355            | <b>2.2373E-02</b> |     |
|                                                                                          |                                          |                               |               | 144                     | 187        | 66             | 65         |                |                            |         |            |         |                   |                   |     |
|                                                                                          |                                          |                               |               | 78                      | 125        | 103            | 96         |                |                            |         |            |         |                   |                   |     |
|                                                                                          |                                          |                               |               | 178                     | 178        | 132            | 128        |                |                            |         |            |         |                   |                   |     |
|                                                                                          |                                          | <b>DOCK7</b><br>(no ortholog) |               |                         |            |                |            |                |                            |         |            |         |                   |                   |     |
|                                                                                          | <b>ATG4C</b><br>(many-to-one ortholog)   | <b>CG6194</b>                 | <b>V22293</b> | <b>109</b>              | <b>130</b> | <b>175</b>     | <b>284</b> | <b>0.3075</b>  | -0.0218                    | 0.6367  | -0.2737    | 0.8880  | <b>6.1945E-02</b> |                   |     |
|                                                                                          |                                          |                               |               |                         |            | 26             | 21         |                |                            |         |            |         |                   | 41                | 57  |
|                                                                                          |                                          |                               |               |                         |            | 51             | 59         |                |                            |         |            |         |                   | 68                | 114 |
|                                                                                          |                                          |                               |               | 32                      | 50         | 66             | 113        |                |                            |         |            |         |                   |                   |     |
|                                                                                          |                                          |                               | <b>V22294</b> | <b>167</b>              | <b>315</b> | <b>557</b>     | <b>496</b> | <b>-0.7501</b> | -0.9808                    | -0.5216 | -1.1610    | -0.3473 | <b>3.2261E-11</b> |                   |     |
|                                                                                          |                                          |                               | 74            | 141                     | 79         | 95             |            |                |                            |         |            |         |                   |                   |     |
|                                                                                          |                                          |                               | 48            | 71                      | 161        | 125            |            |                |                            |         |            |         |                   |                   |     |
|                                                                                          |                                          |                               |               | 45                      | 103        | 317            | 276        |                |                            |         |            |         |                   |                   |     |
| <b>1p13.3</b><br>low-density lipoprotein<br>Willer: rs599839<br>Kathiresan: rs646776     | <b>KIAA1324</b><br>(no ortholog)         |                               |               |                         |            |                |            |                |                            |         |            |         |                   |                   |     |
|                                                                                          | <b>SARS</b><br>(one-to-one ortholog)     | <b>CG17259</b>                | no RNAi       |                         |            |                |            |                |                            |         |            |         |                   |                   |     |

continued on next page

Table S1 – continued from previous page

| Locus                                                 | Human Gene                                                                                                | Fly Gene                               | Insertion                                            | scoring: $tub_p > RNAi$       |                                |                              |                               | ln(OR)                 | confidence interval bounds |         |            |         | p-value           |                   |
|-------------------------------------------------------|-----------------------------------------------------------------------------------------------------------|----------------------------------------|------------------------------------------------------|-------------------------------|--------------------------------|------------------------------|-------------------------------|------------------------|----------------------------|---------|------------|---------|-------------------|-------------------|
|                                                       |                                                                                                           |                                        |                                                      | 1.0 M sucrose                 |                                | 0.15 M sucrose               |                               |                        | 95%                        |         | Bonferroni |         |                   |                   |
|                                                       |                                                                                                           |                                        |                                                      | RNAi                          | control                        | RNAi                         | control                       |                        | lower                      | upper   | lower      | upper   |                   |                   |
|                                                       | <b>CELSR2</b><br>(many-to-one ortholog)                                                                   | <b>CG11895</b><br>starry night         | <b>V1665</b>                                         | <b>83</b><br>32<br>32<br>19   | <b>66</b><br>20<br>28<br>18    | <b>145</b><br>59<br>53<br>33 | <b>163</b><br>66<br>58<br>39  | <b>0.3454</b>          | -0.0657                    | 0.7593  | -0.3751    | 1.0757  | <b>9.0359E-02</b> |                   |
|                                                       |                                                                                                           |                                        | <b>V51379</b>                                        | <b>153</b><br>34<br>37<br>82  | <b>221</b><br>55<br>70<br>96   | <b>118</b><br>19<br>53<br>46 | <b>95</b><br>18<br>20<br>57   | <b>-0.5835</b>         | -0.9390                    | -0.2303 | -1.2119    | 0.0367  | <b>7.8596E-04</b> |                   |
|                                                       |                                                                                                           |                                        | <b>V51382</b>                                        | <b>234</b><br>50<br>58<br>126 | <b>308</b><br>62<br>79<br>167  | <b>146</b><br>37<br>35<br>74 | <b>181</b><br>45<br>42<br>94  | <b>-0.0598</b>         | -0.3457                    | 0.2265  | -0.5645    | 0.4466  | <b>6.7268E-01</b> |                   |
|                                                       |                                                                                                           |                                        | <b>V107993</b>                                       | <b>62</b><br>21<br>21<br>20   | <b>358</b><br>66<br>126<br>166 | <b>116</b><br>22<br>42<br>52 | <b>236</b><br>52<br>102<br>82 | <b>-1.0418</b>         | -1.4102                    | -0.6803 | -1.6981    | -0.4109 | <b>2.4612E-09</b> |                   |
|                                                       | <b>PSRC1</b><br>(no ortholog)                                                                             |                                        |                                                      |                               |                                |                              |                               |                        |                            |         |            |         |                   |                   |
|                                                       | <b>MYBPHL</b><br>(no ortholog)                                                                            |                                        |                                                      |                               |                                |                              |                               |                        |                            |         |            |         |                   |                   |
|                                                       | <b>SORT1</b><br>(no ortholog)                                                                             |                                        |                                                      |                               |                                |                              |                               |                        |                            |         |            |         |                   |                   |
| <b>1p12</b><br>type 2 diabetes<br>Zeggini: rs10923931 | <b>ADAM30</b><br>(no ortholog)                                                                            |                                        |                                                      |                               |                                |                              |                               |                        |                            |         |            |         |                   |                   |
|                                                       | <b>NOTCH2</b><br>(many-to-one ortholog)                                                                   | <b>CG3936</b><br>Notch                 | <b>V100002</b>                                       | <b>0</b><br>0<br>0<br>0       | <b>291</b><br>139<br>68<br>84  | <b>1</b><br>0<br>1<br>0      | <b>211</b><br>62<br>90<br>59  | <b>toxic knockdown</b> |                            |         |            |         |                   |                   |
|                                                       | <b>1q42.13</b><br>triglyceride,<br>high-density lipoprotein<br>Willer: rs2144300<br>Kathiresan: rs4846914 | <b>GALNT2</b><br>(one-to-one ortholog) | <b>CG3254</b><br>polypeptide GalNAc<br>transferase 2 | <b>V26162</b>                 | <b>105</b><br>30<br>75         | <b>106</b><br>46<br>60       | <b>162</b><br>76<br>86        | <b>165</b><br>82<br>83 | <b>0.0089</b>              | -0.3523 | 0.3700     | -0.6273 | 0.6450            | <b>1.0000E+00</b> |
|                                                       |                                                                                                           |                                        | <b>V26163</b>                                        | <b>115</b><br>63<br>52        | <b>104</b><br>42<br>62         | <b>218</b><br>106<br>112     | <b>168</b><br>86<br>82        | <b>-0.1597</b>         | -0.5065                    | 0.1872  | -0.7709    | 0.4518  | <b>3.5103E-01</b> |                   |

continued on next page

Table S1 – continued from previous page

| Locus                                                                 | Human Gene                               | Fly Gene                | Insertion      | scoring: $tub_p > RNAi$ |            |                |            | confidence interval bounds |                |                |                |                |                   |    |    |    |
|-----------------------------------------------------------------------|------------------------------------------|-------------------------|----------------|-------------------------|------------|----------------|------------|----------------------------|----------------|----------------|----------------|----------------|-------------------|----|----|----|
|                                                                       |                                          |                         |                | 1.0 M sucrose           |            | 0.15 M sucrose |            | ln(OR)                     | 95%            |                | Bonferroni     |                | p-value           |    |    |    |
|                                                                       |                                          |                         |                | RNAi                    | control    | RNAi           | control    |                            | lower          | upper          | lower          | upper          |                   |    |    |    |
| <b>2p24.1</b><br>low-density lipoprotein<br>Willer, Kathiresan: rs693 | <b>APOB</b><br>(no ortholog)             |                         |                |                         |            |                |            |                            |                |                |                |                |                   |    |    |    |
| <b>2p23.3</b><br>triglyceride<br>Kathiresan: rs780094                 | <b>NRBP1</b><br>(many-to-one ortholog)   | <b>CG1098</b><br>Madm   | <b>V27346</b>  | <b>135</b>              | <b>285</b> | <b>316</b>     | <b>344</b> | <b>-0.6617</b>             | <b>-0.9267</b> | <b>-0.3993</b> | <b>-1.1331</b> | <b>-0.2000</b> | <b>2.8896E-07</b> |    |    |    |
|                                                                       |                                          |                         |                | 66                      | 128        | 55             | 59         |                            |                |                |                |                |                   |    |    |    |
|                                                                       |                                          |                         |                | 14                      | 28         | 76             | 98         |                            |                |                |                |                |                   |    |    |    |
|                                                                       |                                          |                         |                | 55                      | 129        | 185            | 187        |                            |                |                |                |                |                   |    |    |    |
|                                                                       |                                          |                         | <b>V27347</b>  | <b>361</b>              | <b>378</b> | <b>587</b>     | <b>520</b> | <b>-0.1671</b>             | <b>-0.3580</b> | <b>0.0236</b>  | <b>-0.5061</b> | <b>0.1712</b>  | <b>7.8999E-02</b> |    |    |    |
|                                                                       |                                          |                         |                | 130                     | 145        | 115            | 109        |                            |                |                |                |                |                   |    |    |    |
|                                                                       |                                          |                         |                | 168                     | 160        | 105            | 134        |                            |                |                |                |                |                   |    |    |    |
|                                                                       |                                          |                         |                | 63                      | 73         | 367            | 277        |                            |                |                |                |                |                   |    |    |    |
|                                                                       |                                          |                         | <b>V101758</b> | <b>1</b>                | <b>260</b> | <b>30</b>      | <b>200</b> | <b>-3.6591</b>             | <b>-7.3682</b> | <b>-1.8468</b> | <b>-∞</b>      | <b>-1.0679</b> | <b>8.0921E-10</b> |    |    |    |
|                                                                       |                                          |                         |                | 0                       | 80         | 7              | 54         |                            |                |                |                |                |                   |    |    |    |
|                                                                       |                                          |                         |                | 0                       | 77         | 23             | 111        |                            |                |                |                |                |                   |    |    |    |
|                                                                       |                                          |                         |                | 1                       | 103        | 0              | 35         |                            |                |                |                |                |                   |    |    |    |
|                                                                       | <b>KRTCAP3</b><br>(no ortholog)          |                         |                |                         |            |                |            |                            |                |                |                |                |                   |    |    |    |
|                                                                       | <b>IFT172</b><br>(one-to-one ortholog)   | <b>CG13809</b><br>osm-1 | <b>V24793</b>  | <b>73</b>               | <b>80</b>  | <b>175</b>     | <b>167</b> | <b>-0.1381</b>             | <b>-0.5385</b> | <b>0.2613</b>  | <b>-0.8436</b> | <b>0.5636</b>  | <b>4.9701E-01</b> |    |    |    |
|                                                                       |                                          |                         |                |                         |            |                | 50         |                            |                |                |                |                |                   | 64 | 13 | 17 |
|                                                                       |                                          |                         |                |                         |            |                | 23         |                            |                |                |                |                |                   | 16 | 82 | 69 |
|                                                                       |                                          |                         |                |                         |            | 80             | 81         |                            |                |                |                |                |                   |    |    |    |
|                                                                       |                                          |                         | <b>V24795</b>  | <b>110</b>              | <b>88</b>  | <b>210</b>     | <b>194</b> | <b>0.1437</b>              | <b>-0.2118</b> | <b>0.5007</b>  | <b>-0.4813</b> | <b>0.7744</b>  | <b>4.3453E-01</b> |    |    |    |
|                                                                       |                                          |                         |                | 74                      | 63         | 12             | 18         |                            |                |                |                |                |                   |    |    |    |
|                                                                       |                                          |                         |                | 36                      | 25         | 80             | 80         |                            |                |                |                |                |                   |    |    |    |
|                                                                       |                                          |                         |                |                         |            | 118            | 96         |                            |                |                |                |                |                   |    |    |    |
|                                                                       | <b>FNDC4</b><br>(no ortholog)            |                         |                |                         |            |                |            |                            |                |                |                |                |                   |    |    |    |
|                                                                       | <b>GCKR</b><br>(no ortholog)             |                         |                |                         |            |                |            |                            |                |                |                |                |                   |    |    |    |
|                                                                       | <b>C2orf16</b><br>(no ortholog)          |                         |                |                         |            |                |            |                            |                |                |                |                |                   |    |    |    |
|                                                                       | <b>ZNF512</b><br>(no ortholog)           |                         |                |                         |            |                |            |                            |                |                |                |                |                   |    |    |    |
| <b>2p21</b><br>type 2 diabetes<br>Scott: rs7578597                    | <b>THADA</b><br>(one-to-one ortholog)    | <b>CG15618</b>          | <b>V40006</b>  | <b>0</b>                | <b>134</b> | <b>57</b>      | <b>212</b> | <b>-∞</b>                  | <b>-∞</b>      | <b>-2.2206</b> | <b>-∞</b>      | <b>-1.3286</b> | <b>1.2392E-11</b> |    |    |    |
|                                                                       |                                          |                         |                | 0                       | 65         | 23             | 83         |                            |                |                |                |                |                   |    |    |    |
|                                                                       |                                          |                         |                | 0                       | 69         | 34             | 129        |                            |                |                |                |                |                   |    |    |    |
|                                                                       | <b>PLEKHH2</b><br>(many-to-one ortholog) | <b>CG43867</b>          | not tested     |                         |            |                |            |                            |                |                |                |                |                   |    |    |    |

continued on next page

Table S1 – continued from previous page

| Locus                                       | Human Gene                        | Fly Gene                               | Insertion                | scoring: $tub_p > RNAi$  |                          |                          |                          | ln(OR)          | confidence interval bounds |         |            |        | p-value    |
|---------------------------------------------|-----------------------------------|----------------------------------------|--------------------------|--------------------------|--------------------------|--------------------------|--------------------------|-----------------|----------------------------|---------|------------|--------|------------|
|                                             |                                   |                                        |                          | 1.0 M sucrose            |                          | 0.15 M sucrose           |                          |                 | 95%                        |         | Bonferroni |        |            |
|                                             |                                   |                                        |                          | RNAi                     | control                  | RNAi                     | control                  |                 | lower                      | upper   | lower      | upper  |            |
| 2q24.3<br>fasting glucose<br>Chen: rs563694 | NOSTRIN<br>(one-to-one ortholog)  | CG42388                                | V26372*                  | 206<br>129<br>46<br>31   | 172<br>104<br>47<br>21   | 112<br>44<br>68          | 142<br>55<br>87          | 0.4170          | 0.0851                     | 0.7506  | -0.1667    | 1.0069 | 1.1872E-02 |
|                                             |                                   |                                        | V40328                   | 9<br>5<br>4              | 117<br>59<br>58          | 23<br>7<br>16            | 163<br>50<br>113         | -0.6049         | -1.5406                    | 0.2467  | -2.3273    | 0.8290 | 1.8269E-01 |
|                                             |                                   |                                        | V48694                   | 0<br>0<br>0              | 125<br>63<br>62          | 0<br>0<br>0              | 312<br>136<br>176        | toxic knockdown |                            |         |            |        |            |
|                                             |                                   |                                        | V48695                   | 0<br>0<br>0              | 138<br>79<br>59          | 0<br>0<br>0              | 280<br>115<br>165        | toxic knockdown |                            |         |            |        |            |
|                                             | SPC25<br>(no ortholog)            |                                        |                          |                          |                          |                          |                          |                 |                            |         |            |        |            |
|                                             | G6PC2<br>(many-to-one ortholog)   | CG15400                                | V7261                    | 51<br>23<br>28           | 72<br>34<br>38           | 32<br>26<br>6            | 26<br>14<br>12           | -0.5494         | -1.2318                    | 0.1247  | -1.7471    | 0.6194 | 1.0972E-01 |
|                                             |                                   |                                        |                          |                          |                          |                          |                          |                 |                            |         |            |        |            |
|                                             | ABCB11<br>(many-to-many ortholog) | CG3879<br>Multi drug resistance 49     | V42513                   | 494<br>246<br>105<br>143 | 418<br>173<br>111<br>134 | 377<br>86<br>145<br>146  | 409<br>94<br>168<br>147  | 0.2484          | 0.0527                     | 0.4443  | -0.0985    | 0.5963 | 1.1368E-02 |
|                                             |                                   |                                        | V42514                   | 502<br>197<br>178<br>127 | 462<br>164<br>165<br>133 | 375<br>99<br>138<br>138  | 373<br>85<br>138<br>150  | 0.0776          | -0.1180                    | 0.2734  | -0.2694    | 0.4250 | 4.3571E-01 |
|                                             |                                   | CG8523<br>Multi drug resistance 50     | V51165                   | 0<br>0<br>0<br>0         | 416<br>101<br>227<br>88  | 0<br>0<br>0<br>0         | 420<br>68<br>175<br>177  | toxic knockdown |                            |         |            |        |            |
|                                             |                                   |                                        | V51166                   | 256<br>37<br>112<br>107  | 119<br>26<br>55<br>38    | 729<br>167<br>182<br>380 | 587<br>176<br>193<br>218 | 0.5491          | 0.3003                     | 0.8017  | 0.1121     | 1.0003 | 8.0946E-06 |
|                                             |                                   | CG10181<br>Multiple drug resistance 65 | V9019                    | 177<br>20<br>45<br>112   | 234<br>30<br>50<br>154   | 233<br>37<br>84<br>112   | 240<br>35<br>105<br>100  | -0.2493         | -0.5243                    | 0.0250  | -0.7361    | 0.2348 | 6.8223E-02 |
|                                             |                                   |                                        |                          |                          |                          |                          |                          |                 |                            |         |            |        |            |
| CG10226                                     | V108196                           | 502<br>92<br>201<br>209                | 716<br>152<br>252<br>312 | 531<br>105<br>230<br>196 | 542<br>99<br>220<br>223  | -0.3344                  | -0.5034                  | -0.1657         | -0.6349                    | -0.0350 | 7.6364E-05 |        |            |
|                                             |                                   |                                        |                          |                          |                          |                          |                          |                 |                            |         |            |        |            |
|                                             |                                   |                                        |                          |                          |                          |                          |                          |                 |                            |         |            |        |            |
|                                             |                                   |                                        |                          |                          |                          |                          |                          |                 |                            |         |            |        |            |

continued on next page

Table S1 – continued from previous page

| Locus                                                              | Human Gene                               | Fly Gene                                       | Insertion      | scoring: $tub_p > RNAi$ |            |                |            | confidence interval bounds |         |         |            |         |                   |               |         |        |         |        |                   |
|--------------------------------------------------------------------|------------------------------------------|------------------------------------------------|----------------|-------------------------|------------|----------------|------------|----------------------------|---------|---------|------------|---------|-------------------|---------------|---------|--------|---------|--------|-------------------|
|                                                                    |                                          |                                                |                | 1.0 M sucrose           |            | 0.15 M sucrose |            | ln(OR)                     | 95%     |         | Bonferroni |         | p-value           |               |         |        |         |        |                   |
|                                                                    |                                          |                                                |                | RNAi                    | control    | RNAi           | control    |                            | lower   | upper   | lower      | upper   |                   |               |         |        |         |        |                   |
| <b>3p25.2</b><br>type 2 diabetes<br>Scott: rs1801282               | <b>PPARG</b><br>(many-to-one ortholog)   | <b>CG18023</b><br>Ecdysone-induced protein 78C | <b>V10396</b>  | <b>197</b>              | <b>351</b> | <b>487</b>     | <b>482</b> | <b>-0.5875</b>             | -0.8094 | -0.3672 | -0.9823    | -0.1986 | <b>7.4639E-08</b> |               |         |        |         |        |                   |
|                                                                    |                                          |                                                |                | 85                      | 157        | 105            | 114        |                            |         |         |            |         |                   |               |         |        |         |        |                   |
|                                                                    |                                          |                                                |                | 60                      | 112        | 156            | 136        |                            |         |         |            |         |                   |               |         |        |         |        |                   |
|                                                                    |                                          |                                                |                | 52                      | 82         | 226            | 232        |                            |         |         |            |         |                   |               |         |        |         |        |                   |
| <b>3p14.1</b><br>type 2 diabetes<br>Zeggini: rs4607103             | <b>ADAMTS9</b><br>(many-to-one ortholog) | <b>CG14869</b>                                 | <b>V33346</b>  | <b>183</b>              | <b>350</b> | <b>231</b>     | <b>315</b> | <b>-0.3380</b>             | -0.5927 | -0.0841 | -0.7896    | 0.1103  | <b>7.1741E-03</b> |               |         |        |         |        |                   |
|                                                                    |                                          |                                                |                | 57                      | 102        | 38             | 64         |                            |         |         |            |         |                   |               |         |        |         |        |                   |
|                                                                    |                                          |                                                |                | 66                      | 164        | 106            | 153        |                            |         |         |            |         |                   |               |         |        |         |        |                   |
|                                                                    |                                          |                                                | 60             | 84                      | 87         | 98             |            |                            |         |         |            |         |                   |               |         |        |         |        |                   |
|                                                                    |                                          |                                                | <b>V33347</b>  | <b>70</b>               | <b>314</b> | <b>43</b>      | <b>240</b> |                            |         |         |            |         |                   | <b>0.2182</b> | -0.2150 | 0.6599 | -0.5367 | 1.0040 | <b>3.4741E-01</b> |
|                                                                    |                                          |                                                |                | 22                      | 105        | 15             | 58         |                            |         |         |            |         |                   |               |         |        |         |        |                   |
| 19                                                                 | 133                                      | 17                                             |                | 129                     |            |                |            |                            |         |         |            |         |                   |               |         |        |         |        |                   |
| 29                                                                 | 76                                       | 11                                             | 53             |                         |            |                |            |                            |         |         |            |         |                   |               |         |        |         |        |                   |
| <b>3q27.3</b><br>type 2 diabetes<br>Scott: rs4402960               | <b>IGF2BP2</b><br>(many-to-one ortholog) | <b>CG1691</b><br>IGF-II mRNA-binding protein   | <b>V20321</b>  | <b>340</b>              | <b>256</b> | <b>338</b>     | <b>337</b> | <b>0.2806</b>              | 0.0531  | 0.5086  | -0.1218    | 0.6850  | <b>1.3260E-02</b> |               |         |        |         |        |                   |
|                                                                    |                                          |                                                |                | 107                     | 80         | 124            | 112        |                            |         |         |            |         |                   |               |         |        |         |        |                   |
|                                                                    |                                          |                                                |                | 99                      | 75         | 106            | 109        |                            |         |         |            |         |                   |               |         |        |         |        |                   |
|                                                                    |                                          |                                                |                | 134                     | 101        | 108            | 116        |                            |         |         |            |         |                   |               |         |        |         |        |                   |
|                                                                    |                                          |                                                | <b>V20322</b>  | <b>329</b>              | <b>310</b> | <b>512</b>     | <b>457</b> | <b>-0.0541</b>             | -0.2591 | 0.1509  | -0.4177    | 0.3095  | <b>6.1013E-01</b> |               |         |        |         |        |                   |
|                                                                    |                                          |                                                |                | 125                     | 120        | 216            | 191        |                            |         |         |            |         |                   |               |         |        |         |        |                   |
|                                                                    |                                          |                                                |                | 135                     | 110        | 138            | 137        |                            |         |         |            |         |                   |               |         |        |         |        |                   |
|                                                                    |                                          |                                                |                | 69                      | 80         | 158            | 129        |                            |         |         |            |         |                   |               |         |        |         |        |                   |
|                                                                    | <b>C3orf65</b><br>(no ortholog)          |                                                |                |                         |            |                |            |                            |         |         |            |         |                   |               |         |        |         |        |                   |
| <b>5q13.3</b><br>low-density lipoprotein<br>Kathiresan: rs12654264 | <b>HMGCR</b><br>(one-to-one ortholog)    | <b>CG10367</b><br>HMG Coenzyme A reductase     | <b>V108617</b> | <b>0</b>                | <b>131</b> | <b>0</b>       | <b>563</b> | <b>toxic knockdown</b>     |         |         |            |         |                   |               |         |        |         |        |                   |
|                                                                    |                                          |                                                |                | 0                       | 39         | 0              | 36         |                            |         |         |            |         |                   |               |         |        |         |        |                   |
|                                                                    |                                          |                                                |                | 0                       | 92         | 0              | 450        |                            |         |         |            |         |                   |               |         |        |         |        |                   |
|                                                                    |                                          |                                                |                |                         |            | 0              | 77         |                            |         |         |            |         |                   |               |         |        |         |        |                   |
|                                                                    | <b>COL4A3BP</b><br>(one-to-one ortholog) | <b>CG7207</b><br>ceramide transfer protein     | <b>V27914</b>  | <b>48</b>               | <b>38</b>  | <b>52</b>      | <b>50</b>  | <b>0.1934</b>              | -0.4214 | 0.8114  | -0.8764    | 1.2745  | <b>5.5851E-01</b> |               |         |        |         |        |                   |
|                                                                    |                                          |                                                |                | 14                      | 15         | 35             | 38         |                            |         |         |            |         |                   |               |         |        |         |        |                   |
|                                                                    |                                          |                                                |                | 34                      | 23         | 17             | 12         |                            |         |         |            |         |                   |               |         |        |         |        |                   |
| <b>6p22.3</b><br>type 2 diabetes<br>Scott: rs7754840               | <b>CDKAL1</b><br>(one-to-one ortholog)   | <b>CG6550</b>                                  | <b>V4947</b>   | <b>111</b>              | <b>101</b> | <b>143</b>     | <b>146</b> | <b>0.1149</b>              | -0.2552 | 0.4857  | -0.5360    | 0.7683  | <b>5.2831E-01</b> |               |         |        |         |        |                   |
|                                                                    |                                          |                                                |                | 69                      | 63         | 10             | 14         |                            |         |         |            |         |                   |               |         |        |         |        |                   |
|                                                                    |                                          |                                                |                | 42                      | 38         | 65             | 70         |                            |         |         |            |         |                   |               |         |        |         |        |                   |
|                                                                    |                                          |                                                |                |                         |            | 68             | 62         |                            |         |         |            |         |                   |               |         |        |         |        |                   |
| <b>6p21.32</b><br>low-density lipoprotein<br>Willer: rs2254287     | <b>HLA-DPA1</b><br>(no ortholog)         |                                                |                |                         |            |                |            |                            |         |         |            |         |                   |               |         |        |         |        |                   |
|                                                                    |                                          |                                                |                |                         |            |                |            |                            |         |         |            |         |                   |               |         |        |         |        |                   |
|                                                                    |                                          |                                                |                |                         |            |                |            |                            |         |         |            |         |                   |               |         |        |         |        |                   |
|                                                                    |                                          |                                                |                |                         |            |                |            |                            |         |         |            |         |                   |               |         |        |         |        |                   |
|                                                                    | <b>COL11A2</b><br>(no ortholog)          |                                                |                |                         |            |                |            |                            |         |         |            |         |                   |               |         |        |         |        |                   |
|                                                                    |                                          |                                                |                |                         |            |                |            |                            |         |         |            |         |                   |               |         |        |         |        |                   |
|                                                                    |                                          |                                                |                |                         |            |                |            |                            |         |         |            |         |                   |               |         |        |         |        |                   |
|                                                                    |                                          |                                                |                |                         |            |                |            |                            |         |         |            |         |                   |               |         |        |         |        |                   |
|                                                                    | <b>RXRB</b><br>(many-to-one ortholog)    | <b>CG4380</b><br>ultraspiracle                 | <b>V16893</b>  | <b>97</b>               | <b>190</b> | <b>299</b>     | <b>332</b> | <b>-0.5670</b>             | -0.8699 | -0.2680 | -1.1058    | -0.0424 | <b>1.3486E-04</b> |               |         |        |         |        |                   |
|                                                                    |                                          |                                                |                | 40                      | 72         | 66             | 63         |                            |         |         |            |         |                   |               |         |        |         |        |                   |
|                                                                    |                                          |                                                |                | 33                      | 63         | 115            | 113        |                            |         |         |            |         |                   |               |         |        |         |        |                   |
|                                                                    |                                          |                                                |                | 24                      | 55         | 118            | 156        |                            |         |         |            |         |                   |               |         |        |         |        |                   |
|                                                                    | <b>SLC39A7</b><br>(one-to-one ortholog)  | <b>CG10449</b><br>Catecholamines up            | <b>V7183*</b>  | <b>0</b>                | <b>89</b>  | <b>0</b>       | <b>184</b> | <b>toxic knockdown</b>     |         |         |            |         |                   |               |         |        |         |        |                   |
|                                                                    |                                          |                                                |                | 0                       | 50         | 0              | 29         |                            |         |         |            |         |                   |               |         |        |         |        |                   |
|                                                                    |                                          |                                                |                | 0                       | 19         | 0              | 82         |                            |         |         |            |         |                   |               |         |        |         |        |                   |
|                                                                    |                                          |                                                |                | 0                       | 20         | 0              | 73         |                            |         |         |            |         |                   |               |         |        |         |        |                   |

continued on next page

Table S1 – continued from previous page

| Locus                                                 | Human Gene                              | Fly Gene                               | Insertion      | scoring: $tub_p > RNAi$                      |                                                 |                                                      |                                                       | confidence interval bounds |         |         |            |         |                   |
|-------------------------------------------------------|-----------------------------------------|----------------------------------------|----------------|----------------------------------------------|-------------------------------------------------|------------------------------------------------------|-------------------------------------------------------|----------------------------|---------|---------|------------|---------|-------------------|
|                                                       |                                         |                                        |                | 1.0 M sucrose                                |                                                 | 0.15 M sucrose                                       |                                                       | ln(OR)                     | 95%     |         | Bonferroni |         | p-value           |
|                                                       |                                         |                                        |                | RNAi                                         | control                                         | RNAi                                                 | control                                               |                            | lower   | upper   | lower      | upper   |                   |
|                                                       | <b>HSD17B8</b><br>(one-to-one ortholog) | <b>CG3603</b>                          | <b>V51662*</b> | <b>48</b><br>13<br>18<br>17                  | <b>24</b><br>8<br>10<br>6                       | <b>44</b><br>15<br>7<br>22                           | <b>34</b><br>13<br>7<br>14                            | <b>0.4324</b>              | -0.2793 | 1.1547  | -0.7977    | 1.6992  | <b>2.4075E-01</b> |
|                                                       | <b>MIR219-1</b><br>(no ortholog)        |                                        |                |                                              |                                                 |                                                      |                                                       |                            |         |         |            |         |                   |
|                                                       | <b>RING1</b><br>(many-to-one ortholog)  | <b>CG5595</b><br>Sex combs extra       | <b>V27465</b>  | <b>29</b><br>9<br>5<br>4<br>0<br>6<br>2<br>3 | <b>451</b><br>43<br>96<br>59<br>57<br>36<br>101 | <b>342</b><br>45<br>23<br>48<br>39<br>52<br>66<br>69 | <b>568</b><br>61<br>115<br>94<br>74<br>58<br>93<br>73 | <b>-2.2355</b>             | -2.6711 | -1.8321 | -3.0367    | -1.5530 | <b>1.1701E-42</b> |
|                                                       |                                         |                                        | <b>V106328</b> | <b>0</b><br>0<br>0<br>0                      | <b>520</b><br>189<br>148<br>183                 | <b>0</b><br>0<br>0<br>0                              | <b>484</b><br>111<br>173<br>200                       | <b>toxic knockdown</b>     |         |         |            |         |                   |
|                                                       | <b>VPS52</b><br>(one-to-one ortholog)   | <b>CG7371</b>                          | <b>V27985</b>  | <b>64</b><br>30<br>34                        | <b>58</b><br>31<br>27                           | <b>56</b><br>44<br>12                                | <b>63</b><br>40<br>23                                 | <b>0.2153</b>              | -0.3207 | 0.7535  | -0.7204    | 1.1586  | <b>4.4048E-01</b> |
|                                                       |                                         |                                        | <b>V48711</b>  | <b>145</b><br>79<br>66                       | <b>162</b><br>84<br>78                          | <b>258</b><br>105<br>153                             | <b>322</b><br>151<br>171                              | <b>0.1106</b>              | -0.1768 | 0.3978  | -0.3974    | 0.6178  | <b>4.3665E-01</b> |
|                                                       | <b>RPS18</b><br>(many-to-one ortholog)  | <b>CG8900</b><br>Ribosomal protein S18 | <b>V23083</b>  | <b>285</b><br>88<br>40<br>157                | <b>293</b><br>85<br>40<br>168                   | <b>298</b><br>53<br>30<br>215                        | <b>274</b><br>51<br>41<br>182                         | <b>-0.1116</b>             | -0.3497 | 0.1264  | -0.5335    | 0.3096  | <b>3.4608E-01</b> |
| <b>7p15.2</b><br>type 2 diabetes<br>Zeggini: rs864745 | <b>JAZF1</b><br>(one-to-one ortholog)   | <b>CG12054</b>                         | <b>V45983</b>  | <b>125</b><br>55<br>70                       | <b>138</b><br>69<br>69                          | <b>229</b><br>79<br>150                              | <b>247</b><br>86<br>161                               | <b>-0.0232</b>             | -0.3364 | 0.2895  | -0.5764    | 0.5284  | <b>9.3871E-01</b> |
|                                                       |                                         |                                        | <b>V45986</b>  | <b>174</b><br>63<br>111                      | <b>153</b><br>51<br>102                         | <b>289</b><br>104<br>185                             | <b>257</b><br>78<br>179                               | <b>0.0113</b>              | -0.2727 | 0.2956  | -0.4903    | 0.5141  | <b>9.4426E-01</b> |
| <b>7p13</b><br>fasting glucose<br>Dupuis: rs4607517   | <b>AEBP1</b><br>(no ortholog)           |                                        |                |                                              |                                                 |                                                      |                                                       |                            |         |         |            |         |                   |
|                                                       | <b>MIR4649</b><br>(no ortholog)         |                                        |                |                                              |                                                 |                                                      |                                                       |                            |         |         |            |         |                   |
|                                                       | <b>POLD2</b><br>(one-to-one ortholog)   | <b>CG12018</b><br>BcDNA:HL03874        | not tested     |                                              |                                                 |                                                      |                                                       |                            |         |         |            |         |                   |
|                                                       | <b>MYL7</b><br>(many-to-one ortholog)   | <b>CG2184</b>                          | not tested     |                                              |                                                 |                                                      |                                                       |                            |         |         |            |         |                   |

continued on next page



Table S1 – continued from previous page

| Locus | Human Gene                                                                | Fly Gene                               | Insertion      | scoring: $tub_p > RNAi$ |                            |                            |                                   | confidence interval bounds |           |         |            | p-value |                        |
|-------|---------------------------------------------------------------------------|----------------------------------------|----------------|-------------------------|----------------------------|----------------------------|-----------------------------------|----------------------------|-----------|---------|------------|---------|------------------------|
|       |                                                                           |                                        |                | 1.0 M sucrose           |                            | 0.15 M sucrose             |                                   | ln(OR)                     | 95%       |         | Bonferroni |         |                        |
|       |                                                                           |                                        |                | RNAi                    | control                    | RNAi                       | control                           |                            | lower     | upper   | lower      |         | upper                  |
|       | <b>GCK</b><br>(many-to-many ortholog)                                     | <b>CG3001</b><br>Hexokinase A          | <b>V21054</b>  | 0<br>0<br>0<br>0        | 420<br>88<br>137<br>195    | 315<br>51<br>128<br>136    | 349<br>61<br>114<br>174           | $-\infty$                  | $-\infty$ | -4.6121 | $-\infty$  | -3.7697 | <b>7.9623E-05</b>      |
|       |                                                                           |                                        | <b>V104680</b> | 280<br>89<br>109<br>82  | 333<br>42<br>109<br>182    | 405<br>137<br>148<br>120   | 474<br>150<br>202<br>122          | <b>-0.0160</b>             | -0.2285   | 0.1963  | -0.3930    | 0.3602  | <b>9.1591E-01</b>      |
|       |                                                                           | <b>CG8094</b><br>Hexokinase C          | <b>V35337</b>  | 208<br>102<br>76<br>30  | 368<br>186<br>100<br>82    | 344<br>196<br>55<br>93     | 445<br>229<br>65<br>151           | <b>-0.3129</b>             | -0.5403   | -0.0865 | -0.7168    | 0.0872  | <b>6.1959E-03</b>      |
|       |                                                                           |                                        | <b>V35338</b>  | 12<br>1<br>9<br>2       | 561<br>222<br>221<br>118   | 161<br>92<br>37<br>32      | 466<br>259<br>107<br>100          | <b>-2.7803</b>             | -3.4739   | -2.1786 | -4.0913    | -1.7942 | <b>4.6097E-36</b>      |
|       |                                                                           | <b>CG32849</b><br>Hex-t2               | <b>V47331</b>  | 355<br>63<br>229<br>63  | 431<br>76<br>288<br>67     | 336<br>93<br>53<br>190     | 379<br>81<br>51<br>247            | <b>-0.0735</b>             | -0.2820   | 0.1349  | -0.4432    | 0.2960  | <b>5.0040E-01</b>      |
|       |                                                                           |                                        | <b>V100218</b> | 120<br>58<br>54<br>8    | 212<br>108<br>96<br>8      | 220<br>38<br>96<br>86      | 168<br>27<br>98<br>43             | <b>-0.8376</b>             | -1.1511   | -0.5269 | -1.3937    | -0.2921 | <b>4.1872E-08</b>      |
|       |                                                                           | <b>CG33102</b><br>Hex-t1               | <b>V46573</b>  | 220<br>59<br>119<br>42  | 246<br>52<br>129<br>65     | 285<br>73<br>73<br>139     | 321<br>96<br>74<br>151            | <b>0.0072</b>              | -0.2421   | 0.2565  | -0.4341    | 0.4482  | <b>1.0000E+00</b>      |
|       |                                                                           |                                        | <b>V46574</b>  | 323<br>159<br>102<br>62 | 344<br>177<br>87<br>80     | 687<br>195<br>266<br>226   | 756<br>213<br>260<br>283          | <b>0.0327</b>              | -0.1553   | 0.2206  | -0.3012    | 0.3662  | <b>7.4297E-01</b>      |
|       | <b>YKT6</b><br>(one-to-one ortholog)                                      | <b>CG1515</b>                          | not tested     |                         |                            |                            |                                   |                            |           |         |            |         |                        |
|       | <b>CAMK2B</b><br>(no ortholog)                                            |                                        |                |                         |                            |                            |                                   |                            |           |         |            |         |                        |
|       | <b>7q11.23</b><br>triglyceride<br>Weller: rs17145738<br>Kooner: rs3812316 | <b>BAZ1B</b><br>(one-to-many ortholog) | no RNAi        |                         |                            |                            |                                   |                            |           |         |            |         |                        |
|       |                                                                           | <b>CG4254</b><br>twinstar              |                |                         |                            |                            |                                   |                            |           |         |            |         |                        |
|       |                                                                           | <b>CG6873</b>                          | <b>V22454</b>  | 0<br><del>75</del><br>0 | 28<br><del>121</del><br>28 | 1<br>0<br>0<br>0<br>1<br>0 | 226<br>23<br>24<br>11<br>83<br>85 |                            |           |         |            |         | <b>toxic knockdown</b> |

continued on next page

Table S1 – continued from previous page

| Locus | Human Gene                                                                                            | Fly Gene                                                        | Insertion                                                       | scoring: $tub_p > RNAi$        |                                 |                                 |                                 | ln(OR)                      | confidence interval bounds |         |            |         | p-value           |                   |
|-------|-------------------------------------------------------------------------------------------------------|-----------------------------------------------------------------|-----------------------------------------------------------------|--------------------------------|---------------------------------|---------------------------------|---------------------------------|-----------------------------|----------------------------|---------|------------|---------|-------------------|-------------------|
|       |                                                                                                       |                                                                 |                                                                 | 1.0 M sucrose                  |                                 | 0.15 M sucrose                  |                                 |                             | 95%                        |         | Bonferroni |         |                   |                   |
|       |                                                                                                       |                                                                 |                                                                 | RNAi                           | control                         | RNAi                            | control                         |                             | lower                      | upper   | lower      | upper   |                   |                   |
|       | <b>BCL7B</b><br>(many-to-one ortholog)                                                                | <b>CG17252</b><br>BCL7-like                                     | <b>V20410</b>                                                   | <b>303</b><br>108<br>112<br>83 | <b>309</b><br>108<br>115<br>86  | <b>225</b><br>78<br>89<br>58    | <b>217</b><br>53<br>110<br>54   | <b>-0.0557</b>              | -0.3081                    | 0.1965  | -0.5025    | 0.3905  | <b>6.6260E-01</b> |                   |
|       |                                                                                                       |                                                                 | <b>V106828</b>                                                  | <b>333</b><br>117<br>96<br>120 | <b>419</b><br>154<br>129<br>136 | <b>278</b><br>71<br>81<br>126   | <b>309</b><br>71<br>98<br>140   | <b>-0.1239</b>              | -0.3466                    | 0.0987  | -0.5186    | 0.2704  | <b>2.6919E-01</b> |                   |
|       | <b>TBL2</b><br>(no ortholog)                                                                          |                                                                 |                                                                 |                                |                                 |                                 |                                 |                             |                            |         |            |         |                   |                   |
|       | <b>MLXIPL</b><br>(many-to-one ortholog)                                                               | <b>CG18362</b><br>Mio                                           | <b>V52606</b>                                                   | <b>128</b><br>54<br>50<br>24   | <b>230</b><br>112<br>86<br>32   | <b>264</b><br>104<br>105<br>55  | <b>263</b><br>99<br>105<br>59   | <b>-0.5892</b>              | -0.8754                    | -0.3053 | -1.0972    | -0.0898 | <b>2.5790E-05</b> |                   |
|       |                                                                                                       |                                                                 | <b>V52607</b>                                                   | <b>166</b><br>59<br>100<br>7   | <b>288</b><br>87<br>183<br>18   | <b>390</b><br>121<br>133<br>136 | <b>400</b><br>125<br>163<br>112 | <b>-0.5252</b>              | -0.7697                    | -0.2825 | -0.9598    | -0.0972 | <b>1.4864E-05</b> |                   |
|       | <b>VPS37D</b><br>(many-to-one ortholog)                                                               | <b>CG1115</b>                                                   | not tested                                                      |                                |                                 |                                 |                                 |                             |                            |         |            |         |                   |                   |
|       | <b>DNAJC30</b><br>(one-to-one ortholog)                                                               | <b>CG11035</b>                                                  | <b>V8478</b>                                                    | <b>126</b><br>48<br>78         | <b>106</b><br>48<br>58          | <b>140</b><br>14<br>58<br>68    | <b>180</b><br>13<br>59<br>108   | <b>0.4234</b>               | 0.0699                     | 0.7786  | -0.1977    | 1.0507  | <b>1.5748E-02</b> |                   |
|       | <b>WBSR22</b><br>(one-to-one ortholog)                                                                | <b>CG10903</b>                                                  | <b>V27334</b>                                                   | <b>0</b><br>0<br>0             | <b>164</b><br>72<br>92          | <b>0</b><br>0<br>0              | <b>321</b><br>92<br>229         | <b>toxic knockdown</b>      |                            |         |            |         |                   |                   |
|       | <b>STX1A</b><br>(no ortholog)                                                                         |                                                                 |                                                                 |                                |                                 |                                 |                                 |                             |                            |         |            |         |                   |                   |
|       | <b>8p21.3</b><br>triglyceride,<br>high-density lipoprotein<br>Willer: rs10503669<br>Kathiresan: rs328 | <b>LPL</b><br>(many-to-many ortholog)                           | <b>CG5966</b><br>(shared: LIPC (15q21.3)<br>and LIPG (18q21.1)) | <b>V13163</b>                  | <b>45</b><br>2<br>20<br>23      | <b>61</b><br>8<br>18<br>35      | <b>35</b><br>35<br>35<br>35     | <b>35</b><br>35<br>35<br>35 | <b>-0.3025</b>             | -0.9551 | 0.3473     | -1.4428 | 0.8281            | <b>3.5573E-01</b> |
|       |                                                                                                       |                                                                 | <b>V13164</b>                                                   | <b>181</b><br>55<br>40<br>86   | <b>203</b><br>64<br>30<br>109   | <b>211</b><br>53<br>35<br>123   | <b>213</b><br>59<br>33<br>121   | <b>-0.1051</b>              | -0.3913                    | 0.1807  | -0.6110    | 0.3995  | <b>4.8116E-01</b> |                   |
|       |                                                                                                       | <b>CG6847</b><br>(shared: LIPC (15q21.3)<br>and LIPG (18q21.1)) | <b>V22451</b>                                                   | <b>0</b><br>0<br>0<br>0        | <b>87</b><br>29<br>21<br>37     | <b>21</b><br>6<br>5<br>10       | <b>72</b><br>25<br>13<br>34     | <b>-∞</b>                   | -∞                         | -1.7861 | -∞         | -0.8024 | <b>3.3388E-07</b> |                   |

continued on next page

Table S1 – continued from previous page

| Locus                                           | Human Gene                                                                       | Fly Gene                | Insertion  | scoring: $tub_p > RNAi$ |         |                |         | confidence interval bounds |         |         |            |            |            |         |         |        |         |        |            |
|-------------------------------------------------|----------------------------------------------------------------------------------|-------------------------|------------|-------------------------|---------|----------------|---------|----------------------------|---------|---------|------------|------------|------------|---------|---------|--------|---------|--------|------------|
|                                                 |                                                                                  |                         |            | 1.0 M sucrose           |         | 0.15 M sucrose |         | ln(OR)                     | 95%     |         | Bonferroni |            | p-value    |         |         |        |         |        |            |
|                                                 |                                                                                  |                         |            | RNAi                    | control | RNAi           | control |                            | lower   | upper   | lower      | upper      |            |         |         |        |         |        |            |
| 8q24.11<br>type 2 diabetes<br>Scott: rs13266634 | SLC30A8<br>(many-to-many ortholog)                                               | CG3994<br>ZnT35C        | V3836      | 76                      | 74      | 56             | 80      | 0.3820                     | -0.1113 | 0.8788  | -0.4790    | 1.2555     | 1.2304E-01 |         |         |        |         |        |            |
|                                                 |                                                                                  |                         |            | 22                      | 21      | 18             | 23      |                            |         |         |            |            |            |         |         |        |         |        |            |
|                                                 |                                                                                  |                         |            | 27                      | 24      | 11             | 9       |                            |         |         |            |            |            |         |         |        |         |        |            |
|                                                 |                                                                                  |                         |            | 27                      | 29      | 27             | 48      |                            |         |         |            |            |            |         |         |        |         |        |            |
|                                                 |                                                                                  |                         | V103263    | 691                     | 636     | 509            | 570     |                            |         |         |            |            |            | 0.1960  | 0.0320  | 0.3603 | -0.0954 | 0.4881 | 1.7454E-02 |
|                                                 |                                                                                  |                         |            | 182                     | 165     | 101            | 99      |                            |         |         |            |            |            |         |         |        |         |        |            |
|                                                 |                                                                                  | 292                     | 296        | 216                     | 203     |                |         |                            |         |         |            |            |            |         |         |        |         |        |            |
|                                                 |                                                                                  | 217                     | 175        | 192                     | 268     |                |         |                            |         |         |            |            |            |         |         |        |         |        |            |
|                                                 |                                                                                  | CG31860                 | V7688      | 0                       | 375     | 0              | 403     | toxic knockdown            |         |         |            |            |            |         |         |        |         |        |            |
|                                                 |                                                                                  |                         |            | 0                       | 36      | 0              | 61      |                            |         |         |            |            |            |         |         |        |         |        |            |
|                                                 |                                                                                  |                         |            | 0                       | 112     | 0              | 179     |                            |         |         |            |            |            |         |         |        |         |        |            |
|                                                 |                                                                                  |                         |            | 0                       | 227     | 0              | 163     |                            |         |         |            |            |            |         |         |        |         |        |            |
|                                                 | V103398                                                                          | 422                     | 104        | 772                     | 417     | 570            | -0.2913 | -0.4685                    | -0.1143 | -0.6062 | 0.0229     | 1.0656E-03 |            |         |         |        |         |        |            |
|                                                 |                                                                                  |                         | 146        | 244                     | 150     | 166            |         |                            |         |         |            |            |            |         |         |        |         |        |            |
|                                                 |                                                                                  |                         | 172        | 391                     | 208     | 336            |         |                            |         |         |            |            |            |         |         |        |         |        |            |
|                                                 |                                                                                  |                         | 172        | 391                     | 208     | 336            |         |                            |         |         |            |            |            |         |         |        |         |        |            |
| 8q24.13<br>triglyceride<br>Willer: rs17321515   | TRIB1<br>(many-to-one ortholog)                                                  | CG5408<br>tribbles      | V22113     | 280                     | 347     | 598            | 626     | -0.1687                    | -0.3670 | 0.0291  | -0.5209    | 0.1818     | 9.4502E-02 |         |         |        |         |        |            |
|                                                 |                                                                                  |                         |            | 108                     | 134     | 160            | 182     |                            |         |         |            |            |            |         |         |        |         |        |            |
|                                                 |                                                                                  |                         |            | 115                     | 141     | 173            | 182     |                            |         |         |            |            |            |         |         |        |         |        |            |
|                                                 |                                                                                  |                         |            | 57                      | 72      | 265            | 262     |                            |         |         |            |            |            |         |         |        |         |        |            |
|                                                 |                                                                                  |                         | V22114     | 210                     | 291     | 458            | 521     |                            |         |         |            |            |            | -0.1972 | -0.4210 | 0.0258 | -0.5947 | 0.1971 | 7.7562E-02 |
|                                                 |                                                                                  |                         |            | 118                     | 152     | 87             | 85      |                            |         |         |            |            |            |         |         |        |         |        |            |
|                                                 |                                                                                  | 61                      | 88         | 174                     | 220     |                |         |                            |         |         |            |            |            |         |         |        |         |        |            |
|                                                 |                                                                                  | 31                      | 51         | 197                     | 216     |                |         |                            |         |         |            |            |            |         |         |        |         |        |            |
|                                                 |                                                                                  | V106774                 | 461        | 149                     | 582     | 498            | 475     | -0.2802                    | -0.4596 | -0.1012 | -0.5990    | 0.0375     | 1.7888E-03 |         |         |        |         |        |            |
|                                                 |                                                                                  |                         |            | 115                     | 152     | 124            | 85      |                            |         |         |            |            |            |         |         |        |         |        |            |
|                                                 |                                                                                  |                         |            | 181                     | 169     | 166            | 178     |                            |         |         |            |            |            |         |         |        |         |        |            |
|                                                 |                                                                                  |                         |            | 16                      | 76      | 129            | 152     |                            |         |         |            |            |            |         |         |        |         |        |            |
| 9p21.3<br>type 2 diabetes<br>Scott: rs10811661  | MTAP<br>(one-to-many ortholog)                                                   | CG4802                  | not tested |                         |         |                |         |                            |         |         |            |            |            |         |         |        |         |        |            |
|                                                 |                                                                                  |                         |            |                         |         |                |         |                            |         |         |            |            |            |         |         |        |         |        |            |
|                                                 |                                                                                  | CG31115                 | not tested |                         |         |                |         |                            |         |         |            |            |            |         |         |        |         |        |            |
|                                                 |                                                                                  |                         |            |                         |         |                |         |                            |         |         |            |            |            |         |         |        |         |        |            |
|                                                 |                                                                                  | CDKN2A<br>(no ortholog) |            |                         |         |                |         |                            |         |         |            |            |            |         |         |        |         |        |            |
|                                                 |                                                                                  | CDKN2B<br>(no ortholog) |            |                         |         |                |         |                            |         |         |            |            |            |         |         |        |         |        |            |
|                                                 | 9q31.1<br>high-density lipoprotein<br>Willer: rs4149268<br>Kathiresan: rs3890182 | ABCA1<br>(no ortholog)  |            |                         |         |                |         |                            |         |         |            |            |            |         |         |        |         |        |            |
|                                                 |                                                                                  |                         |            |                         |         |                |         |                            |         |         |            |            |            |         |         |        |         |        |            |
|                                                 | 10p13<br>type 2 diabetes<br>Zeggini: rs12779790                                  | NUDT5<br>(no ortholog)  |            |                         |         |                |         |                            |         |         |            |            |            |         |         |        |         |        |            |
|                                                 |                                                                                  |                         |            |                         |         |                |         |                            |         |         |            |            |            |         |         |        |         |        |            |
|                                                 |                                                                                  |                         |            | CDC123<br>(no ortholog) |         |                |         |                            |         |         |            |            |            |         |         |        |         |        |            |
|                                                 |                                                                                  |                         |            | CAMK1D<br>(no ortholog) |         |                |         |                            |         |         |            |            |            |         |         |        |         |        |            |

continued on next page

Table S1 – continued from previous page

| Locus                                           | Human Gene                   | Fly Gene                                      | Insertion                      | scoring: $tub_p > RNAi$               |         |                |         | confidence interval bounds |         |            |            |            |            |            |            |
|-------------------------------------------------|------------------------------|-----------------------------------------------|--------------------------------|---------------------------------------|---------|----------------|---------|----------------------------|---------|------------|------------|------------|------------|------------|------------|
|                                                 |                              |                                               |                                | 1.0 M sucrose                         |         | 0.15 M sucrose |         | ln(OR)                     | 95%     |            | Bonferroni |            | p-value    |            |            |
|                                                 |                              |                                               |                                | RNAi                                  | control | RNAi           | control |                            | lower   | upper      | lower      | upper      |            |            |            |
| 10q23.33<br>type 2 diabetes<br>Scott: rs1111875 | IDE<br>(one-to-one ortholog) | CG5517<br>Insulin degrading metalloproteinase | V15957                         | 55                                    | 178     | 66             | 216     | 0.0112                     | -0.4204 | 0.4403     | -0.7504    | 0.7639     | 1.0000E+00 |            |            |
|                                                 |                              |                                               |                                | 38                                    | 98      | 6              | 17      |                            |         |            |            |            |            |            |            |
|                                                 |                              |                                               | KIF11<br>(one-to-one ortholog) | CG9191<br>Kinesin-like protein at 61F | V15958  | 71             | 174     | 252                        | 411     | -0.4068    | -0.7404    | -0.0797    | -1.0023    | 0.1644     | 1.2433E-02 |
|                                                 |                              |                                               |                                |                                       |         | 29             | 54      | 9                          | 12      |            |            |            |            |            |            |
|                                                 |                              |                                               |                                |                                       | V101317 | 3              | 39      | 26                         | 54      | 0.1055     | -0.1956    | 0.4069     | -0.4258    | 0.6380     | 5.0496E-01 |
|                                                 |                              |                                               |                                |                                       |         | 20             | 21      | 72                         | 85      |            |            |            |            |            |            |
|                                                 |                              |                                               |                                |                                       |         | 9              | 16      | 45                         | 71      |            |            |            |            |            |            |
|                                                 |                              |                                               |                                |                                       |         | 10             | 44      | 62                         | 94      |            |            |            |            |            |            |
|                                                 |                              |                                               |                                |                                       |         |                |         | 38                         | 95      |            |            |            |            |            |            |
|                                                 |                              |                                               |                                |                                       |         |                |         | 82                         | 92      |            |            |            |            |            |            |
|                                                 |                              | 38                                            | 43                             |                                       |         |                |         |                            |         |            |            |            |            |            |            |
|                                                 |                              | 71                                            | 50                             |                                       |         |                |         |                            |         |            |            |            |            |            |            |
|                                                 |                              | 27                                            | 33                             |                                       |         |                |         |                            |         |            |            |            |            |            |            |
| HHEX<br>(one-to-one ortholog)                   | CG7056                       | V52548                                        | 166                            | 223                                   | 332     | 363            | -0.2057 | -0.4642                    | 0.0518  | -0.6639    | 0.2489     | 1.1241E-01 |            |            |            |
|                                                 |                              |                                               | 62                             | 80                                    | 112     | 84             |         |                            |         |            |            |            |            |            |            |
|                                                 |                              | V52549                                        | 46                             | 94                                    | 129     | 153            | 0.4925  | 0.1606                     | 0.8262  | -0.0914    | 1.0830     | 2.6050E-03 |            |            |            |
|                                                 |                              |                                               | 32                             | 14                                    | 14      | 15             |         |                            |         |            |            |            |            |            |            |
|                                                 |                              |                                               | 13                             | 14                                    | 27      | 32             |         |                            |         |            |            |            |            |            |            |
|                                                 |                              |                                               | 13                             | 21                                    | 50      | 79             |         |                            |         |            |            |            |            |            |            |
|                                                 |                              | V109280                                       | 76                             | 57                                    | 112     | 143            | -0.2054 | -0.5034                    | 0.0919  | -0.7322    | 0.3191     | 1.6503E-01 |            |            |            |
|                                                 |                              |                                               | 28                             | 28                                    | 121     | 170            |         |                            |         |            |            |            |            |            |            |
|                                                 |                              |                                               | 9                              | 9                                     | 10      | 18             |         |                            |         |            |            |            |            |            |            |
|                                                 |                              | V15719                                        | CG7056                         | V15719                                | 163     | 217            | 179     | 194                        | -∞      | -∞         | -2.2184    | -∞         | -1.2822    | 2.2235E-10 |            |
| 61                                              | 97                           |                                               |                                |                                       | 131     | 133            |         |                            |         |            |            |            |            |            |            |
| V15721                                          | 49                           |                                               |                                | 42                                    | 18      | 32             | -3.2599 | -4.0624                    | -2.5923 | -4.8014    | -2.1858    | 2.1611E-52 |            |            |            |
|                                                 | 53                           |                                               |                                | 78                                    | 30      | 29             |         |                            |         |            |            |            |            |            |            |
|                                                 | 0                            |                                               |                                | 59                                    | 46      | 72             |         |                            |         |            |            |            |            |            |            |
|                                                 | 0                            |                                               |                                | 14                                    | 4       | 9              |         |                            |         |            |            |            |            |            |            |
|                                                 | 0                            |                                               |                                | 16                                    | 6       | 23             |         |                            |         |            |            |            |            |            |            |
|                                                 | 0                            |                                               |                                | 1                                     | 36      | 40             |         |                            |         |            |            |            |            |            |            |
|                                                 | 0                            |                                               |                                | 9                                     |         |                |         |                            |         |            |            |            |            |            |            |
|                                                 | 0                            |                                               |                                | 20                                    |         |                |         |                            |         |            |            |            |            |            |            |
| V100292                                         | 9                            | 263                                           | 647                            | 725                                   | -∞      | -∞             | -1.3184 | -∞                         | -0.2890 | 3.2854E-05 |            |            |            |            |            |
|                                                 | 7                            | 106                                           | 19                             | 12                                    |         |                |         |                            |         |            |            |            |            |            |            |
|                                                 | 1                            | 70                                            | 53                             | 84                                    |         |                |         |                            |         |            |            |            |            |            |            |
|                                                 | 1                            | 87                                            | 108                            | 103                                   |         |                |         |                            |         |            |            |            |            |            |            |
|                                                 |                              |                                               | 68                             | 90                                    |         |                |         |                            |         |            |            |            |            |            |            |
|                                                 |                              |                                               | 356                            | 383                                   |         |                |         |                            |         |            |            |            |            |            |            |
|                                                 |                              | 43                                            | 53                             |                                       |         |                |         |                            |         |            |            |            |            |            |            |
| V100292                                         | 0                            | 354                                           | 13                             | 285                                   | -∞      | -∞             | -1.3184 | -∞                         | -0.2890 | 3.2854E-05 |            |            |            |            |            |
|                                                 | 0                            | 184                                           | 2                              | 142                                   |         |                |         |                            |         |            |            |            |            |            |            |
|                                                 | 0                            | 77                                            | 4                              | 70                                    |         |                |         |                            |         |            |            |            |            |            |            |
|                                                 | 0                            | 93                                            | 7                              | 73                                    |         |                |         |                            |         |            |            |            |            |            |            |

continued on next page

Table S1 – continued from previous page

| Locus                                                  | Human Gene                               | Fly Gene                                                     | Insertion      | scoring: $tub_p > RNAi$ |                         |                          |                          | confidence interval bounds |         |         |            |         |                   |
|--------------------------------------------------------|------------------------------------------|--------------------------------------------------------------|----------------|-------------------------|-------------------------|--------------------------|--------------------------|----------------------------|---------|---------|------------|---------|-------------------|
|                                                        |                                          |                                                              |                | 1.0 M sucrose           |                         | 0.15 M sucrose           |                          | ln(OR)                     | 95%     |         | Bonferroni |         | p-value           |
|                                                        |                                          |                                                              |                | RNAi                    | control                 | RNAi                     | control                  |                            | lower   | upper   | lower      | upper   |                   |
| <b>10q25.2</b><br>type 2 diabetes<br>Sladek: rs7903146 | <b>TCF7L2</b><br>(many-to-one ortholog)  | <b>CG34403</b><br>pangolin                                   | <b>V3014</b>   | 7<br>7                  | 32<br>32                | 82<br>71<br>11           | 77<br>53<br>24           | -1.5754                    | -2.6214 | -0.6662 | -3.5391    | -0.0785 | <b>1.3333E-04</b> |
| <b>11p15.1</b><br>type 2 diabetes<br>Scott: rs5219     | <b>NUCB2</b><br>(many-to-one ortholog)   | <b>CG32190</b><br>NUCB1                                      | <b>V5319</b>   | 224<br>101<br>92<br>31  | 212<br>88<br>101<br>23  | 543<br>105<br>194<br>244 | 546<br>95<br>215<br>236  | 0.0605                     | -0.1679 | 0.2891  | -0.3440    | 0.4658  | <b>6.1022E-01</b> |
|                                                        |                                          |                                                              | <b>V100688</b> | 230<br>74<br>79<br>77   | 330<br>133<br>91<br>106 | 290<br>80<br>139<br>71   | 289<br>73<br>145<br>71   | -0.3641                    | -0.6057 | -0.1233 | -0.7926    | 0.0615  | <b>2.4160E-03</b> |
|                                                        | <b>NCR3LG1</b><br>(no ortholog)          |                                                              |                |                         |                         |                          |                          |                            |         |         |            |         |                   |
|                                                        | <b>KCNJ11</b><br>(many-to-many ortholog) | <b>CG4370</b><br>Inwardly rectifying<br>potassium channel 2  | <b>V4341</b>   | 84<br>33<br>9<br>42     | 260<br>138<br>34<br>88  | 21<br>9<br>12<br>0       | 226<br>84<br>101<br>41   | 1.2442                     | 0.7187  | 1.8075  | 0.3522     | 2.2708  | <b>3.6149E-07</b> |
|                                                        |                                          |                                                              | <b>V108140</b> | 0<br>0<br>0<br>0        | 72<br>14<br>35<br>23    | 0<br>0<br>0<br>0         | 304<br>103<br>117<br>84  | <b>toxic knockdown</b>     |         |         |            |         |                   |
|                                                        |                                          | <b>CG6747</b><br>Inwardly rectifying<br>potassium channel    | <b>V28430</b>  | 0<br>0<br>0<br>0        | 338<br>135<br>73<br>130 | 0<br>0<br>0<br>0         | 482<br>219<br>123<br>140 | <b>toxic knockdown</b>     |         |         |            |         |                   |
|                                                        |                                          |                                                              | <b>V28431</b>  | 0<br>0<br>0<br>0        | 482<br>55<br>165<br>262 | 0<br>0<br>0<br>0         | 484<br>254<br>79<br>151  | <b>toxic knockdown</b>     |         |         |            |         |                   |
|                                                        |                                          |                                                              | <b>V107389</b> | 81<br>18<br>30<br>33    | 115<br>24<br>46<br>45   | 195<br>82<br>57<br>56    | 193<br>68<br>64<br>61    | -0.3602                    | -0.7238 | 0.0007  | -1.0035    | 0.2729  | <b>4.3830E-02</b> |
|                                                        |                                          | <b>CG10369</b><br>Inwardly rectifying<br>potassium channel 3 | <b>V3886</b>   | 232<br>131<br>43<br>58  | 216<br>94<br>56<br>66   | 187<br>45<br>102<br>40   | 222<br>52<br>118<br>52   | 0.2427                     | -0.0347 | 0.5208  | -0.2470    | 0.7349  | <b>8.7180E-02</b> |
|                                                        |                                          |                                                              | <b>V101174</b> | 103<br>56<br>21<br>26   | 282<br>160<br>48<br>74  | 288<br>49<br>167<br>72   | 387<br>54<br>250<br>83   | -0.7111                    | -0.9950 | -0.4314 | -1.2174    | -0.2207 | <b>2.2441E-07</b> |
|                                                        | <b>ABCC8</b><br>(many-to-one ortholog)   | <b>CG7806</b>                                                | <b>V2804</b>   | 265<br>123<br>82<br>60  | 216<br>101<br>76<br>39  | 626<br>175<br>252<br>199 | 639<br>201<br>241<br>197 | 0.2249                     | 0.0087  | 0.4416  | -0.1576    | 0.6099  | <b>3.6819E-02</b> |

continued on next page

Table S1 – continued from previous page

| Locus                                                                      | Human Gene                       | Fly Gene                           | Insertion  | scoring: $tub_p > RNAi$ |         |                |         | ln(OR)          | confidence interval bounds |            |            |        | p-value    |
|----------------------------------------------------------------------------|----------------------------------|------------------------------------|------------|-------------------------|---------|----------------|---------|-----------------|----------------------------|------------|------------|--------|------------|
|                                                                            |                                  |                                    |            | 1.0 M sucrose           |         | 0.15 M sucrose |         |                 | 95%                        |            | Bonferroni |        |            |
|                                                                            |                                  |                                    |            | RNAi                    | control | RNAi           | control |                 | lower                      | upper      | lower      | upper  |            |
| 11p11.2<br>type 2 diabetes<br>Sladek: rs1113132<br>rs11037909<br>rs3740878 | EXT2<br>(one-to-one ortholog)    | CG8433<br>Ext2                     | V4902      | 139                     | 153     | 175            | 173     | -0.1073         | -0.4310                    | 0.2159     | -0.6786    | 0.4624 | 5.2576E-01 |
|                                                                            |                                  |                                    |            | 94                      | 103     | 14             | 14      |                 |                            |            |            |        |            |
|                                                                            |                                  |                                    |            | 45                      | 50      | 80             | 83      |                 |                            |            |            |        |            |
|                                                                            |                                  |                                    |            |                         |         | 81             | 76      |                 |                            |            |            |        |            |
|                                                                            |                                  |                                    | V4903      | 50                      | 43      | 215            | 196     | 0.0582          | -0.4175                    | 0.5370     | -0.7755    | 0.9028 | 8.1903E-01 |
|                                                                            |                                  |                                    |            | 22                      | 21      | 5              | 16      |                 |                            |            |            |        |            |
|                                                                            |                                  |                                    |            | 28                      | 22      | 81             | 71      |                 |                            |            |            |        |            |
|                                                                            |                                  |                                    |            |                         |         | 129            | 109     |                 |                            |            |            |        |            |
|                                                                            |                                  |                                    | V49808*    | 4                       | 63      | 3              | 101     | toxic knockdown |                            |            |            |        |            |
|                                                                            |                                  |                                    |            | 3                       | 46      | 3              | 66      |                 |                            |            |            |        |            |
|                                                                            |                                  |                                    |            | 0                       | 8       | 0              | 35      |                 |                            |            |            |        |            |
|                                                                            |                                  |                                    |            | 1                       | 9       |                |         |                 |                            |            |            |        |            |
| V49809                                                                     | 85                               | 86                                 | 254        | 234                     | -0.0936 | -0.4575        | 0.2702  | -0.7352         | 0.5473                     | 6.5675E-01 |            |        |            |
|                                                                            | 34                               | 31                                 | 143        | 113                     |         |                |         |                 |                            |            |            |        |            |
|                                                                            | 51                               | 55                                 | 111        | 121                     |         |                |         |                 |                            |            |            |        |            |
|                                                                            | ALX4<br>(no ortholog)            |                                    |            |                         |         |                |         |                 |                            |            |            |        |            |
| 11q23.3<br>triglyceride<br>Willer: rs12286037<br>Kathiresan: rs28927680    | BUD13<br>(one-to-one ortholog)   | CG13625                            | not tested |                         |         |                |         |                 |                            |            |            |        |            |
|                                                                            |                                  |                                    | V12665*    | 0                       | 93      | 1              | 191     | toxic knockdown |                            |            |            |        |            |
|                                                                            |                                  |                                    |            | 0                       | 32      | 1              | 47      |                 |                            |            |            |        |            |
|                                                                            | 0                                | 37                                 | 0          | 86                      |         |                |         |                 |                            |            |            |        |            |
|                                                                            | ZNF259<br>(one-to-one ortholog)  | CG9060<br>Zpr1                     |            | 0                       | 24      | 0              | 58      |                 |                            |            |            |        |            |
|                                                                            | APOA5<br>(no ortholog)           |                                    |            |                         |         |                |         |                 |                            |            |            |        |            |
|                                                                            | APOA4<br>(no ortholog)           |                                    |            |                         |         |                |         |                 |                            |            |            |        |            |
|                                                                            | APOC3<br>(no ortholog)           |                                    |            |                         |         |                |         |                 |                            |            |            |        |            |
|                                                                            | APOA1<br>(no ortholog)           |                                    |            |                         |         |                |         |                 |                            |            |            |        |            |
|                                                                            | SIK3<br>(one-to-one ortholog)    | CG42856<br>Salt-inducible kinase 3 | not tested |                         |         |                |         |                 |                            |            |            |        |            |
| 12q15<br>type 2 diabetes<br>Zeggini: rs7961581                             | TSPAN8<br>(many-to-one ortholog) | CG6120<br>Tetraspanin 96F          | V3422      | 179                     | 169     | 163            | 195     | 0.2364          | -0.0700                    | 0.5435     | -0.3037    | 0.7791 | 1.3196E-01 |
|                                                                            |                                  |                                    |            | 49                      | 52      | 33             | 42      |                 |                            |            |            |        |            |
|                                                                            |                                  |                                    |            | 42                      | 27      | 111            | 122     |                 |                            |            |            |        |            |
|                                                                            |                                  |                                    |            | 88                      | 90      | 19             | 31      |                 |                            |            |            |        |            |
|                                                                            |                                  |                                    | V3423      | 190                     | 200     | 155            | 155     | -0.0512         | -0.3608                    | 0.2582     | -0.5977    | 0.4948 | 7.6107E-01 |
|                                                                            |                                  |                                    |            | 33                      | 21      | 47             | 42      |                 |                            |            |            |        |            |
|                                                                            |                                  |                                    |            | 44                      | 43      | 69             | 72      |                 |                            |            |            |        |            |
|                                                                            |                                  |                                    |            | 113                     | 136     | 39             | 41      |                 |                            |            |            |        |            |
|                                                                            |                                  |                                    | V101411    | 208                     | 264     | 179            | 227     | -0.0008         | -0.2770                    | 0.2755     | -0.4888    | 0.4877 | 1.0000E+00 |
|                                                                            |                                  |                                    |            | 72                      | 105     | 52             | 69      |                 |                            |            |            |        |            |
|                                                                            |                                  |                                    |            | 76                      | 93      | 81             | 100     |                 |                            |            |            |        |            |
|                                                                            |                                  |                                    |            | 60                      | 66      | 46             | 58      |                 |                            |            |            |        |            |
|                                                                            | LGR5<br>(no ortholog)            |                                    |            |                         |         |                |         |                 |                            |            |            |        |            |

continued on next page

Table S1 – continued from previous page

| Locus                                                                                                              | Human Gene                              | Fly Gene                                                      | Insertion      | scoring: $tub_p > RNAi$ |            |                |            | confidence interval bounds |         |            |         | p-value |                   |
|--------------------------------------------------------------------------------------------------------------------|-----------------------------------------|---------------------------------------------------------------|----------------|-------------------------|------------|----------------|------------|----------------------------|---------|------------|---------|---------|-------------------|
|                                                                                                                    |                                         |                                                               |                | 1.0 M sucrose           |            | 0.15 M sucrose |            | 95%                        |         | Bonferroni |         |         |                   |
|                                                                                                                    |                                         |                                                               |                | RNAi                    | control    | RNAi           | control    | lower                      | upper   | lower      | upper   |         |                   |
| <b>12q23.3</b><br>high-density lipoprotein<br>Willer: rs2338104                                                    | <b>MYO1H</b><br>(no ortholog)           |                                                               |                |                         |            |                |            |                            |         |            |         |         |                   |
|                                                                                                                    | <b>KCTD10</b><br>(many-to-one ortholog) | <b>CG10465</b>                                                | <b>V107131</b> | <b>198</b>              | <b>313</b> | <b>244</b>     | <b>255</b> | <b>-0.4134</b>             | -0.6718 | -0.1560    | -0.8713 | 0.0410  | <b>1.2206E-03</b> |
|                                                                                                                    |                                         |                                                               |                | 75                      | 103        | 46             | 34         |                            |         |            |         |         |                   |
|                                                                                                                    |                                         |                                                               |                | 54                      | 99         | 145            | 170        |                            |         |            |         |         |                   |
|                                                                                                                    | <b>UBE3B</b><br>(one-to-one ortholog)   | <b>CG5087</b>                                                 | not tested     |                         |            |                |            |                            |         |            |         |         |                   |
|                                                                                                                    | <b>MMAB</b><br>(no ortholog)            |                                                               |                |                         |            |                |            |                            |         |            |         |         |                   |
|                                                                                                                    | <b>MVK</b><br>(one-to-one ortholog)     | <b>CG33671</b>                                                | <b>V49772*</b> | <b>10</b>               | <b>65</b>  | <b>34</b>      | <b>39</b>  | <b>-1.7222</b>             | -2.6514 | -0.8691    | -3.4127 | -0.2930 | <b>1.1478E-05</b> |
|                                                                                                                    |                                         |                                                               |                | 2                       | 21         | 20             | 26         |                            |         |            |         |         |                   |
|                                                                                                                    |                                         |                                                               |                | 6                       | 23         | 14             | 13         |                            |         |            |         |         |                   |
|                                                                                                                    |                                         |                                                               |                | 2                       | 21         |                |            |                            |         |            |         |         |                   |
| <b>15q21.3</b><br>high-density lipoprotein<br>Willer: rs4775041<br>Kathiresan: rs1800588                           | <b>LIPC</b><br>(many-to-many ortholog)  | <b>CG5966</b><br>(shared: LPL (8p21.3)<br>and LIPG (18q21.1)) | <b>V13163</b>  | <b>45</b>               | <b>61</b>  | <b>35</b>      | <b>35</b>  | <b>-0.3025</b>             | -0.9551 | 0.3473     | -1.4428 | 0.8281  | <b>3.5573E-01</b> |
|                                                                                                                    |                                         |                                                               |                | 2                       | 8          | 35             | 35         |                            |         |            |         |         |                   |
|                                                                                                                    |                                         |                                                               |                | 20                      | 18         |                |            |                            |         |            |         |         |                   |
|                                                                                                                    |                                         |                                                               |                | 23                      | 35         |                |            |                            |         |            |         |         |                   |
|                                                                                                                    |                                         |                                                               | <b>V13164</b>  | <b>181</b>              | <b>203</b> | <b>211</b>     | <b>213</b> | <b>-0.1051</b>             | -0.3913 | 0.1807     | -0.6110 | 0.3995  | <b>4.8116E-01</b> |
|                                                                                                                    |                                         |                                                               |                | 55                      | 64         | 53             | 59         |                            |         |            |         |         |                   |
|                                                                                                                    |                                         |                                                               |                | 40                      | 30         | 35             | 33         |                            |         |            |         |         |                   |
|                                                                                                                    |                                         |                                                               |                | 86                      | 109        | 123            | 121        |                            |         |            |         |         |                   |
|                                                                                                                    |                                         | <b>CG6847</b><br>(shared: LPL (8p21.3)<br>and LIPG (18q21.1)) | <b>V22451</b>  | <b>0</b>                | <b>87</b>  | <b>21</b>      | <b>72</b>  | <b>-∞</b>                  | -∞      | -1.7861    | -∞      | -0.8024 | <b>3.3388E-07</b> |
|                                                                                                                    |                                         |                                                               |                | 0                       | 29         | 6              | 25         |                            |         |            |         |         |                   |
|                                                                                                                    |                                         |                                                               |                | 0                       | 21         | 5              | 13         |                            |         |            |         |         |                   |
|                                                                                                                    |                                         |                                                               |                | 0                       | 37         | 10             | 34         |                            |         |            |         |         |                   |
| <b>16q12.1</b><br>type 2 diabetes<br>Scott: rs8050136                                                              | <b>RPGRIP1L</b><br>(no ortholog)        |                                                               |                |                         |            |                |            |                            |         |            |         |         |                   |
|                                                                                                                    | <b>FTO</b><br>(no ortholog)             |                                                               |                |                         |            |                |            |                            |         |            |         |         |                   |
| <b>16q12.2</b><br>high-density lipoprotein<br>Willer: rs9989419<br>rs3764261<br>rs1864163<br>Kathiresan: rs1800775 | <b>CETP</b><br>(no ortholog)            |                                                               |                |                         |            |                |            |                            |         |            |         |         |                   |
|                                                                                                                    | <b>NLRCS</b><br>(no ortholog)           |                                                               |                |                         |            |                |            |                            |         |            |         |         |                   |

continued on next page

Table S1 – continued from previous page

| Locus                                                           | Human Gene                                | Fly Gene                                                                | Insertion      | scoring: $tub_p > RNAi$  |                          |                          |                          | confidence interval bounds |         |         |            |         |            |
|-----------------------------------------------------------------|-------------------------------------------|-------------------------------------------------------------------------|----------------|--------------------------|--------------------------|--------------------------|--------------------------|----------------------------|---------|---------|------------|---------|------------|
|                                                                 |                                           |                                                                         |                | 1.0 M sucrose            |                          | 0.15 M sucrose           |                          | ln(OR)                     | 95%     |         | Bonferroni |         | p-value    |
|                                                                 |                                           |                                                                         |                | RNAi                     | control                  | RNAi                     | control                  |                            | lower   | upper   | lower      | upper   |            |
|                                                                 | <b>SLC12A3</b><br>(many-to-many ortholog) | <b>CG4357</b><br>sodium chloride<br>cotransporter 69                    | <b>V30000</b>  | 473<br>214<br>138<br>121 | 445<br>203<br>136<br>106 | 269<br>42<br>100<br>127  | 381<br>58<br>92<br>231   | 0.4088                     | 0.2012  | 0.6172  | 0.0414     | 0.7790  | 7.7131E-05 |
|                                                                 |                                           |                                                                         | <b>V30001</b>  | 232<br>75<br>2<br>155    | 244<br>59<br>1<br>184    | 539<br>190<br>151<br>198 | 547<br>198<br>143<br>206 | -0.0357                    | -0.2572 | 0.1857  | -0.4284    | 0.3566  | 7.8344E-01 |
|                                                                 |                                           |                                                                         | <b>V106499</b> | 465<br>131<br>182<br>152 | 535<br>168<br>183<br>184 | 363<br>82<br>198<br>83   | 376<br>84<br>182<br>110  | -0.1050                    | -0.3000 | 0.0900  | -0.4511    | 0.2408  | 2.8562E-01 |
|                                                                 |                                           | <b>CG31547</b>                                                          | <b>V8551</b>   | 337<br>44<br>113<br>180  | 420<br>54<br>135<br>231  | 273<br>74<br>100<br>99   | 299<br>64<br>101<br>134  | -0.1291                    | -0.3530 | 0.0948  | -0.5259    | 0.2674  | 2.6624E-01 |
|                                                                 |                                           |                                                                         | <b>V8552</b>   | 96<br>24<br>6<br>66      | 118<br>42<br>20<br>56    | 83<br>18<br>5<br>60      | 72<br>19<br>8<br>45      | -0.3475                    | -0.7850 | 0.0877  | -1.1176    | 0.4147  | 1.1362E-01 |
|                                                                 |                                           |                                                                         | <b>V105911</b> | 426<br>121<br>148<br>157 | 511<br>148<br>187<br>176 | 441<br>64<br>212<br>165  | 426<br>63<br>223<br>140  | -0.2164                    | -0.4060 | -0.0271 | -0.5531    | 0.1194  | 2.3589E-02 |
|                                                                 | <b>HERPUD1</b><br>(many-to-one ortholog)  | <b>CG14536</b><br>Homocysteine-induced<br>endoplasmic reticulum protein | <b>V11724</b>  | 198<br>94<br>56<br>48    | 167<br>64<br>45<br>58    | 614<br>110<br>299<br>205 | 539<br>98<br>252<br>189  | 0.0400                     | -0.2030 | 0.2837  | -0.3897    | 0.4722  | 7.6354E-01 |
|                                                                 |                                           |                                                                         | <b>V11725</b>  | 56<br>11<br>8<br>37      | 51<br>8<br>11<br>32      | 147<br>13<br>49<br>85    | 152<br>14<br>50<br>88    | 0.1267                     | -0.3391 | 0.5940  | -0.6900    | 0.9490  | 6.5239E-01 |
|                                                                 | <b>MIR138-2</b><br>(no ortholog)          |                                                                         |                |                          |                          |                          |                          |                            |         |         |            |         |            |
| <b>18q21.1</b><br>high-density lipoprotein<br>Willer: rs2156552 | <b>LIPG</b><br>(many-to-many ortholog)    | <b>CG5966</b><br>(shared: LPL (8p21.3)<br>and LIPC (15q21.3))           | <b>V13163</b>  | 45<br>2<br>20<br>23      | 61<br>8<br>18<br>35      | 35<br>35                 | 35<br>35                 | -0.3025                    | -0.9551 | 0.3473  | -1.4428    | 0.8281  | 3.5573E-01 |
|                                                                 |                                           |                                                                         | <b>V13164</b>  | 181<br>55<br>40<br>86    | 203<br>64<br>30<br>109   | 211<br>53<br>35<br>123   | 213<br>59<br>33<br>121   | -0.1051                    | -0.3913 | 0.1807  | -0.6110    | 0.3995  | 4.8116E-01 |
|                                                                 |                                           | <b>CG6847</b><br>(shared: LPL (8p21.3)<br>and LIPC (15q21.3))           | <b>V22451</b>  | 0<br>0<br>0<br>0         | 87<br>29<br>21<br>37     | 21<br>6<br>5<br>10       | 72<br>25<br>13<br>34     | -∞                         | -∞      | -1.7861 | -∞         | -0.8024 | 3.3388E-07 |
|                                                                 | <b>ACAA2</b><br>(one-to-one ortholog)     | <b>CG4600</b><br>yippee interacting protein 2                           | <b>V26562</b>  | 92<br>25<br>67           | 62<br>18<br>44           | 216<br>103<br>113        | 191<br>102<br>89         | 0.2712                     | -0.1209 | 0.6675  | -0.4153    | 0.9730  | 1.8314E-01 |

continued on next page



Table S1 – continued from previous page

| Locus                                                                      | Human Gene                        | Fly Gene           | Insertion                       | scoring: $tub_p > RNAi$ |         |                |         | confidence interval bounds |         |        |            | p-value    |            |                 |
|----------------------------------------------------------------------------|-----------------------------------|--------------------|---------------------------------|-------------------------|---------|----------------|---------|----------------------------|---------|--------|------------|------------|------------|-----------------|
|                                                                            |                                   |                    |                                 | 1.0 M sucrose           |         | 0.15 M sucrose |         | ln(OR)                     | 95%     |        | Bonferroni |            |            |                 |
|                                                                            |                                   |                    |                                 | RNAi                    | control | RNAi           | control |                            | lower   | upper  | lower      |            | upper      |                 |
| 19p13.2<br>low-density lipoprotein<br>Willer: rs6511720                    | SMARCA4<br>(many-to-one ortholog) | CG5942<br>brahma   | V37720                          | 0                       | 197     | 0              | 189     | toxic knockdown            |         |        |            |            |            |                 |
|                                                                            |                                   |                    |                                 | 0                       | 62      | 0              | 36      |                            |         |        |            |            |            |                 |
|                                                                            |                                   |                    |                                 | 0                       | 70      | 0              | 76      |                            |         |        |            |            |            |                 |
|                                                                            |                                   |                    |                                 | 0                       | 25      | 0              | 46      |                            |         |        |            |            |            |                 |
|                                                                            |                                   |                    |                                 | 0                       | 40      | 0              | 31      |                            |         |        |            |            |            |                 |
|                                                                            |                                   |                    | V37721                          | 0                       | 266     | 1              | 315     | toxic knockdown            |         |        |            |            |            |                 |
|                                                                            |                                   |                    |                                 | 0                       | 77      | 0              | 64      |                            |         |        |            |            |            |                 |
|                                                                            |                                   |                    |                                 | 0                       | 62      | 0              | 64      |                            |         |        |            |            |            |                 |
|                                                                            |                                   |                    |                                 | 0                       | 100     | 0              | 65      |                            |         |        |            |            |            |                 |
|                                                                            |                                   |                    |                                 | 0                       | 27      | 1              | 122     |                            |         |        |            |            |            |                 |
| LDLR<br>(no ortholog)                                                      |                                   |                    |                                 |                         |         |                |         |                            |         |        |            |            |            |                 |
| SPC24<br>(no ortholog)                                                     |                                   |                    |                                 |                         |         |                |         |                            |         |        |            |            |            |                 |
| KANK2<br>(no ortholog)                                                     |                                   |                    |                                 |                         |         |                |         |                            |         |        |            |            |            |                 |
| 19p13.11<br>triglyceride,<br>low-density lipoprotein<br>Willer: rs16996148 | GATAD2A<br>(many-to-one ortholog) | CG32067<br>simjang | V13066                          | 281                     | 500     | 271            | 539     | 0.1113                     | -0.1006 | 0.3233 | -0.2643    | 0.4873     | 2.9266E-01 |                 |
|                                                                            |                                   |                    |                                 | 71                      | 174     | 52             | 107     |                            |         |        |            |            |            |                 |
|                                                                            |                                   |                    |                                 | 115                     | 172     | 80             | 167     |                            |         |        |            |            |            |                 |
|                                                                            |                                   |                    |                                 | 95                      | 154     | 139            | 265     |                            |         |        |            |            |            |                 |
|                                                                            |                                   |                    |                                 | 0                       | 437     | 0              | 303     |                            |         |        |            |            |            | toxic knockdown |
|                                                                            |                                   |                    | 0                               | 67                      | 0       | 64             |         |                            |         |        |            |            |            |                 |
|                                                                            |                                   |                    | 0                               | 108                     | 0       | 112            |         |                            |         |        |            |            |            |                 |
|                                                                            |                                   |                    | 0                               | 262                     | 0       | 127            |         |                            |         |        |            |            |            |                 |
|                                                                            |                                   |                    | 0                               | 262                     | 0       | 127            |         |                            |         |        |            |            |            |                 |
|                                                                            |                                   |                    | TSSK6<br>(many-to-one ortholog) | CG14305                 | V17477  | 388            | 356     | 485                        | 512     | 0.1402 | -0.0544    | 0.3349     | -0.2048    | 0.4859          |
| 161                                                                        | 137                               | 78                 |                                 |                         |         | 77             |         |                            |         |        |            |            |            |                 |
| 126                                                                        | 110                               | 156                |                                 |                         |         | 157            |         |                            |         |        |            |            |            |                 |
| 101                                                                        | 109                               | 251                |                                 |                         |         | 278            |         |                            |         |        |            |            |            |                 |
| NDUFA13<br>(one-to-one ortholog)                                           | CG3446                            | V42696*            | 1                               | 120                     | 174     | 174            | -4.7813 | -8.4498                    | -3.0197 | -∞     | -2.3002    | 4.1032E-28 |            |                 |
|                                                                            |                                   |                    | 1                               | 80                      | 37      | 54             |         |                            |         |        |            |            |            |                 |
|                                                                            |                                   |                    | 0                               | 24                      | 68      | 57             |         |                            |         |        |            |            |            |                 |
|                                                                            |                                   |                    | 0                               | 16                      | 69      | 63             |         |                            |         |        |            |            |            |                 |
| YJEFN3<br>(many-to-one ortholog)                                           | CG2974                            |                    | not tested                      |                         |         |                |         |                            |         |        |            |            |            |                 |
| CILP2<br>(no ortholog)                                                     |                                   |                    |                                 |                         |         |                |         |                            |         |        |            |            |            |                 |

continued on next page

Table S1 – continued from previous page

| Locus | Human Gene                                                                    | Fly Gene                       | Insertion      | scoring: $tub_p > RNAi$ |         |                |         | confidence interval bounds |         |         |            |         |            |  |
|-------|-------------------------------------------------------------------------------|--------------------------------|----------------|-------------------------|---------|----------------|---------|----------------------------|---------|---------|------------|---------|------------|--|
|       |                                                                               |                                |                | 1.0 M sucrose           |         | 0.15 M sucrose |         | ln(OR)                     | 95%     |         | Bonferroni |         | p-value    |  |
|       |                                                                               |                                |                | RNAi                    | control | RNAi           | control |                            | lower   | upper   | lower      | upper   |            |  |
|       | <b>PBX4</b><br>(many-to-one ortholog)                                         | <b>CG8933</b><br>extradenticle | <b>V7802</b>   | 0                       | 164     | 0              | 66      |                            |         |         |            |         |            |  |
|       |                                                                               |                                |                | 0                       | 19      | 0              | 47      |                            |         |         |            |         |            |  |
|       |                                                                               |                                |                | 0                       | 56      | 0              | 7       |                            |         |         |            |         |            |  |
|       |                                                                               |                                |                | 0                       | 89      | 0              | 12      |                            |         |         |            |         |            |  |
|       |                                                                               |                                | <b>V7803</b>   | 0                       | 106     | 0              | 268     |                            |         |         |            |         |            |  |
|       |                                                                               |                                |                | 0                       | 35      | 0              | 57      |                            |         |         |            |         |            |  |
|       |                                                                               |                                |                | 0                       | 52      | 0              | 113     |                            |         |         |            |         |            |  |
|       |                                                                               |                                |                | 5                       | 41      | 0              | 98      |                            |         |         |            |         |            |  |
|       |                                                                               |                                |                | 0                       | 19      |                |         |                            |         |         |            |         |            |  |
|       |                                                                               |                                | <b>V100259</b> | 3                       | 379     | 0              | 315     |                            |         |         |            |         |            |  |
|       |                                                                               |                                |                | 3                       | 115     | 0              | 49      |                            |         |         |            |         |            |  |
|       |                                                                               |                                |                | 0                       | 104     | 0              | 82      |                            |         |         |            |         |            |  |
|       |                                                                               |                                |                | 0                       | 160     | 0              | 184     |                            |         |         |            |         |            |  |
|       |                                                                               |                                | <b>V100687</b> | 17                      | 315     | 11             | 187     | -0.0860                    | -0.9274 | 0.7963  | -1.5376    | 1.5059  | 8.4274E-01 |  |
|       |                                                                               |                                |                | 2                       | 67      | 1              | 37      |                            |         |         |            |         |            |  |
|       |                                                                               |                                |                | 8                       | 86      | 1              | 49      |                            |         |         |            |         |            |  |
|       |                                                                               |                                |                | 7                       | 162     | 9              | 101     |                            |         |         |            |         |            |  |
|       | <b>LPAR2</b><br>(no ortholog)                                                 |                                |                |                         |         |                |         |                            |         |         |            |         |            |  |
|       | <b>GMIP</b><br>(no ortholog)                                                  |                                |                |                         |         |                |         |                            |         |         |            |         |            |  |
|       | <b>ATP13A1</b><br>(one-to-one ortholog)                                       | <b>CG6230</b>                  | <b>V8897</b>   | 0                       | 134     | 44             | 179     | -∞                         | -∞      | -2.1193 | -∞         | -1.2139 | 3.4181E-10 |  |
|       |                                                                               |                                |                | 0                       | 86      | 9              | 14      |                            |         |         |            |         |            |  |
|       |                                                                               |                                |                | 0                       | 48      | 21             | 74      |                            |         |         |            |         |            |  |
|       |                                                                               |                                |                |                         |         | 14             | 91      |                            |         |         |            |         |            |  |
|       | <b>19q13.33</b><br>low-density lipoprotein<br>Willer: rs10402271<br>rs4420638 | <b>BCL3</b><br>(no ortholog)   |                |                         |         |                |         |                            |         |         |            |         |            |  |
|       |                                                                               | <b>CBLC</b><br>(no ortholog)   |                |                         |         |                |         |                            |         |         |            |         |            |  |
|       |                                                                               | <b>BCAM</b><br>(no ortholog)   |                |                         |         |                |         |                            |         |         |            |         |            |  |

continued on next page

Table S1 – continued from previous page

| Locus                             | Human Gene                                     | Fly Gene | Insertion | scoring: $tub_p > RNAi$ |                 |                 |                 | ln(OR)  | confidence interval bounds |            |            |            | p-value    |        |         |         |         |         |            |            |
|-----------------------------------|------------------------------------------------|----------|-----------|-------------------------|-----------------|-----------------|-----------------|---------|----------------------------|------------|------------|------------|------------|--------|---------|---------|---------|---------|------------|------------|
|                                   |                                                |          |           | 1.0 M sucrose           |                 | 0.15 M sucrose  |                 |         | 95%                        |            | Bonferroni |            |            |        |         |         |         |         |            |            |
|                                   |                                                |          |           | RNAi                    | control         | RNAi            | control         |         | lower                      | upper      | lower      | upper      |            |        |         |         |         |         |            |            |
| PVRL2<br>(many-to-one ortholog)   | CG17716<br>faint sausage                       | V6561    | 271       | 297                     | 362             | 395             | -0.0044         | -0.2282 | 0.2194                     | -0.4012    | 0.3921     | 1.0000E+00 |            |        |         |         |         |         |            |            |
|                                   |                                                |          | 92        | 126                     | 130             | 126             |                 |         |                            |            |            |            |            |        |         |         |         |         |            |            |
|                                   |                                                |          | 109       | 108                     | 121             | 140             |                 |         |                            |            |            |            |            |        |         |         |         |         |            |            |
|                                   |                                                |          | 70        | 63                      | 111             | 129             |                 |         |                            |            |            |            |            |        |         |         |         |         |            |            |
|                                   |                                                |          | V6562     | 131                     | 138             | 116             |                 |         |                            |            |            |            | 137        | 0.1141 | -0.2444 | 0.4732  | -0.5167 | 0.7470  | 5.3981E-01 |            |
|                                   |                                                |          |           | 65                      | 73              | 70              |                 |         |                            |            |            |            | 83         |        |         |         |         |         |            |            |
|                                   |                                                |          |           | 47                      | 37              | 23              |                 |         |                            |            |            |            | 28         |        |         |         |         |         |            |            |
|                                   |                                                |          |           | 19                      | 28              | 23              |                 |         |                            |            |            |            | 26         |        |         |         |         |         |            |            |
|                                   |                                                |          | V24476    | 359                     | 359             | 640             |                 |         |                            |            |            |            | 649        | 0.0140 | -0.1728 | 0.2007  | -0.3176 | 0.3455  | 8.8897E-01 |            |
|                                   |                                                |          |           | 177                     | 175             | 84              |                 |         |                            |            |            |            | 119        |        |         |         |         |         |            |            |
| 52                                | 57                                             | 132      |           | 125                     |                 |                 |                 |         |                            |            |            |            |            |        |         |         |         |         |            |            |
| V42236                            | 177                                            | 273      | 235       | 317                     | -0.1339         | -0.3958         | 0.1273          | -0.5978 | 0.3276                     | 3.0269E-01 |            |            |            |        |         |         |         |         |            |            |
|                                   | 63                                             | 82       | 56        | 97                      |                 |                 |                 |         |                            |            |            |            |            |        |         |         |         |         |            |            |
|                                   | 80                                             | 120      | 138       | 146                     |                 |                 |                 |         |                            |            |            |            |            |        |         |         |         |         |            |            |
| V42237                            | 177                                            | 273      | 235       | 317                     | -0.1339         | -0.3958         | 0.1273          | -0.5978 | 0.3276                     | 3.0269E-01 |            |            |            |        |         |         |         |         |            |            |
|                                   | 63                                             | 82       | 56        | 97                      |                 |                 |                 |         |                            |            |            |            |            |        |         |         |         |         |            |            |
|                                   | 80                                             | 120      | 138       | 146                     |                 |                 |                 |         |                            |            |            |            |            |        |         |         |         |         |            |            |
| V42237                            | 103                                            | 167      | 154       | 200                     | -0.2215         | -0.5587         | 0.1139          | -0.8176 | 0.3683                     | 1.8956E-01 |            |            |            |        |         |         |         |         |            |            |
|                                   | 27                                             | 33       | 27        | 20                      |                 |                 |                 |         |                            |            |            |            |            |        |         |         |         |         |            |            |
|                                   | 47                                             | 79       | 84        | 103                     |                 |                 |                 |         |                            |            |            |            |            |        |         |         |         |         |            |            |
| V102073                           | 125                                            | 159      | 121       | 146                     | -0.0527         | -0.4029         | 0.2975          | -0.6699 | 0.5641                     | 7.9717E-01 |            |            |            |        |         |         |         |         |            |            |
|                                   | 55                                             | 63       | 29        | 40                      |                 |                 |                 |         |                            |            |            |            |            |        |         |         |         |         |            |            |
|                                   | 33                                             | 54       | 62        | 72                      |                 |                 |                 |         |                            |            |            |            |            |        |         |         |         |         |            |            |
| TOMM40<br>(many-to-many ortholog) | CG8330<br>tomboy40                             | V23763   | 0         | 98                      | 1               | 38              | toxic knockdown | 0.1063  | -0.2546                    | 0.4679     | -0.5291    | 0.7442     | 5.9658E-01 |        |         |         |         |         |            |            |
|                                   |                                                |          | 0         | 69                      | 0               | 32              |                 |         |                            |            |            |            |            |        |         |         |         |         |            |            |
|                                   |                                                |          | 0         | 4                       | 1               | 5               |                 |         |                            |            |            |            |            |        |         |         |         |         |            |            |
|                                   |                                                |          | 0         | 25                      | 0               | 1               |                 |         |                            |            |            |            |            |        |         |         |         |         |            |            |
|                                   |                                                |          | V23764    | 92                      | 226             | 86              |                 |         |                            |            |            |            |            | 235    | 0.1063  | -0.2546 | 0.4679  | -0.5291 | 0.7442     | 5.9658E-01 |
|                                   |                                                |          |           | 45                      | 91              | 14              |                 |         |                            |            |            |            |            | 50     |         |         |         |         |            |            |
|                                   |                                                |          |           | 8                       | 31              | 44              |                 |         |                            |            |            |            |            | 118    |         |         |         |         |            |            |
|                                   |                                                |          |           | 39                      | 104             | 28              |                 |         |                            |            |            |            |            | 67     |         |         |         |         |            |            |
|                                   |                                                |          | V42439    | 2                       | 626             | 35              |                 |         |                            |            |            |            |            | 882    | -2.5185 | -4.6722 | -1.1531 | -7.1161 | -0.4745    | 1.5529E-06 |
|                                   |                                                |          |           | 2                       | 182             | 4               |                 |         |                            |            |            |            |            | 98     |         |         |         |         |            |            |
| 0                                 | 22                                             | 1        |           | 175                     |                 |                 |                 |         |                            |            |            |            |            |        |         |         |         |         |            |            |
| 0                                 | 176                                            | 12       |           | 294                     |                 |                 |                 |         |                            |            |            |            |            |        |         |         |         |         |            |            |
| 0                                 | 95                                             | 1        |           | 61                      |                 |                 |                 |         |                            |            |            |            |            |        |         |         |         |         |            |            |
| 0                                 | 77                                             | 3        |           | 103                     |                 |                 |                 |         |                            |            |            |            |            |        |         |         |         |         |            |            |
| 0                                 | 74                                             | 14       | 151       |                         |                 |                 |                 |         |                            |            |            |            |            |        |         |         |         |         |            |            |
| V105557                           | 1                                              | 427      | 4         | 615                     | toxic knockdown | -0.2546         | 0.4679          | -0.5291 | 0.7442                     | 5.9658E-01 |            |            |            |        |         |         |         |         |            |            |
|                                   | 0                                              | 207      | 0         | 47                      |                 |                 |                 |         |                            |            |            |            |            |        |         |         |         |         |            |            |
|                                   | 1                                              | 139      | 4         | 308                     |                 |                 |                 |         |                            |            |            |            |            |        |         |         |         |         |            |            |
|                                   | 0                                              | 81       | 0         | 260                     |                 |                 |                 |         |                            |            |            |            |            |        |         |         |         |         |            |            |
| V13177                            | CG12157<br>Translocase of<br>outer membrane 40 | 0        | 309       | 0                       | 303             | toxic knockdown | -0.2546         | 0.4679  | -0.5291                    | 0.7442     | 5.9658E-01 |            |            |        |         |         |         |         |            |            |
|                                   | 0                                              | 130      | 0         | 42                      |                 |                 |                 |         |                            |            |            |            |            |        |         |         |         |         |            |            |
|                                   | 0                                              | 113      | 0         | 108                     |                 |                 |                 |         |                            |            |            |            |            |        |         |         |         |         |            |            |
|                                   | 0                                              | 66       | 0         | 153                     |                 |                 |                 |         |                            |            |            |            |            |        |         |         |         |         |            |            |
| V13178                            | 135                                            | 318      | 156       | 366                     | -0.0040         | -0.2890         | 0.2804          | -0.5083 | 0.4980                     | 1.0000E+00 |            |            |            |        |         |         |         |         |            |            |
|                                   | 59                                             | 172      | 76        | 207                     |                 |                 |                 |         |                            |            |            |            |            |        |         |         |         |         |            |            |
|                                   | 41                                             | 68       | 47        | 81                      |                 |                 |                 |         |                            |            |            |            |            |        |         |         |         |         |            |            |
|                                   | 35                                             | 78       | 33        | 78                      |                 |                 |                 |         |                            |            |            |            |            |        |         |         |         |         |            |            |

continued on next page

Table S1 – continued from previous page

| Locus | Human Gene                             | Fly Gene                | Insertion      | scoring: $tub_p > RNAi$                      |                                                         |                                                         |                                                          | confidence interval bounds |         |            |         | p-value |                   |
|-------|----------------------------------------|-------------------------|----------------|----------------------------------------------|---------------------------------------------------------|---------------------------------------------------------|----------------------------------------------------------|----------------------------|---------|------------|---------|---------|-------------------|
|       |                                        |                         |                | 1.0 M sucrose                                |                                                         | 0.15 M sucrose                                          |                                                          | 95%                        |         | Bonferroni |         |         |                   |
|       |                                        |                         |                | RNAi                                         | control                                                 | RNAi                                                    | control                                                  | lower                      | upper   | lower      | upper   |         |                   |
|       | <b>APOE</b><br>(no ortholog)           |                         |                |                                              |                                                         |                                                         |                                                          |                            |         |            |         |         |                   |
|       | <b>APOC1</b><br>(no ortholog)          |                         |                |                                              |                                                         |                                                         |                                                          |                            |         |            |         |         |                   |
|       | <b>APOC4</b><br>(no ortholog)          |                         |                |                                              |                                                         |                                                         |                                                          |                            |         |            |         |         |                   |
|       | <b>APOC2</b><br>(no ortholog)          |                         |                |                                              |                                                         |                                                         |                                                          |                            |         |            |         |         |                   |
|       | <b>CLPTM1</b><br>(one-to-one ortholog) | <b>CG3702</b>           | not tested     |                                              |                                                         |                                                         |                                                          |                            |         |            |         |         |                   |
|       | <b>RELB</b><br>(many-to-one ortholog)  | <b>CG6667</b><br>dorsal | <b>V45996</b>  | <b>370</b><br>96<br>91<br>111<br>72          | <b>559</b><br>130<br>196<br>152<br>81                   | <b>293</b><br>53<br>35<br>87<br>118                     | <b>303</b><br>52<br>52<br>75<br>124                      | <b>-0.3788</b>             | -0.5919 | -0.1660    | -0.7569 | -0.0019 | <b>3.8680E-04</b> |
|       |                                        |                         | <b>V45998</b>  | <b>183</b><br>51<br>56<br>40<br>36           | <b>216</b><br>72<br>75<br>42<br>27                      | <b>117</b><br>29<br>36<br>36<br>16                      | <b>136</b><br>32<br>31<br>38<br>35                       | <b>-0.0153</b>             | -0.3436 | 0.3135     | -0.5939 | 0.5651  | <b>9.3589E-01</b> |
|       |                                        |                         | <b>V105491</b> | <b>19</b><br>1<br>0<br>2<br>4<br>3<br>9<br>0 | <b>640</b><br>140<br>102<br>150<br>56<br>52<br>58<br>82 | <b>566</b><br>31<br>52<br>14<br>141<br>85<br>121<br>122 | <b>784</b><br>56<br>78<br>73<br>132<br>100<br>127<br>218 | <b>-3.1901</b>             | -3.7162 | -2.7203    | -4.1735 | -2.4106 | <b>8.1235E-92</b> |

**Table S1. RNAi screen for sucrose sensitivity: knockdowns.** Experimental data associated with Figures 1–2. Human genomic regions and SNPs, human genes within ~100 kb radius window and their Ensembl 43 fly orthologs, fly RNAi lines (as VDRC catalog numbers), and experimental results are shown, as well as p-values and confidence intervals for the null hypothesis that the odds of knockdown vs. non-knockdown survival are the same on 1.0 M sucrose as on 0.15 M sucrose. Survival to pupariation was scored except for a small number of crosses, marked in the table with asterisks, where survival to eclosion was scored for technical reasons. In the “scoring” columns, bold numbers are total counts, and counts for individual trials are listed immediately underneath them.

Table S2 – RNAi backgrounds  
(data associated with Figure 1)

| Fly Strain                                                              | scoring: $tub_P > RNAi$ |            |                |             | ln(OR)         | confidence interval bounds |        |            |        | p-value           |
|-------------------------------------------------------------------------|-------------------------|------------|----------------|-------------|----------------|----------------------------|--------|------------|--------|-------------------|
|                                                                         | 1.0 M sucrose           |            | 0.15 M sucrose |             |                | 95%                        |        | Bonferroni |        |                   |
|                                                                         | RNAi                    | control    | RNAi           | control     |                | lower                      | upper  | lower      | upper  |                   |
| <b>GD control: <math>w^{1118}</math></b>                                | <b>261</b>              | <b>278</b> | <b>1497</b>    | <b>1526</b> | <b>-0.0439</b> | -0.2317                    | 0.1437 | -0.3776    | 0.2891 | <b>6.4045E-01</b> |
|                                                                         | 39                      | 39         | 295            | 318         |                |                            |        |            |        |                   |
|                                                                         | 71                      | 64         | 382            | 396         |                |                            |        |            |        |                   |
|                                                                         | 41                      | 49         | 76             | 74          |                |                            |        |            |        |                   |
|                                                                         | 9                       | 13         | 78             | 80          |                |                            |        |            |        |                   |
|                                                                         | 12                      | 14         | 71             | 69          |                |                            |        |            |        |                   |
|                                                                         | 70                      | 76         | 105            | 73          |                |                            |        |            |        |                   |
|                                                                         | 19                      | 23         | 95             | 110         |                |                            |        |            |        |                   |
|                                                                         |                         |            | 194            | 159         |                |                            |        |            |        |                   |
|                                                                         |                         |            | 109            | 119         |                |                            |        |            |        |                   |
|                                                                         |                         |            | 92             | 128         |                |                            |        |            |        |                   |
| <b>KK control: <math>y^- w^{1118}; P\{attP y^+ w^3\}VIE-260B</math></b> | <b>234</b>              | <b>239</b> | <b>419</b>     | <b>403</b>  | <b>-0.0600</b> | -0.2928                    | 0.1727 | -0.4725    | 0.3521 | <b>6.0406E-01</b> |
|                                                                         | 89                      | 79         | 148            | 146         |                |                            |        |            |        |                   |
|                                                                         | 23                      | 31         | 58             | 62          |                |                            |        |            |        |                   |
|                                                                         | 33                      | 44         | 106            | 87          |                |                            |        |            |        |                   |
|                                                                         | 34                      | 36         | 4              | 11          |                |                            |        |            |        |                   |
|                                                                         | 55                      | 49         | 103            | 97          |                |                            |        |            |        |                   |

**Table S2. RNAi screen for sucrose sensitivity: controls.** Control data associated with Figure 1. Survival to pupariation of progeny of  $w^{1118}$  and  $y^- w^{1118}; P\{attP y^+ w^3\}VIE-260B$  males crossed to  $tub_P$ -GAL4/TM6B unmated females. In the “scoring” columns, bold numbers are total counts, and counts for individual trials are listed immediately underneath them. Similar survival indicates that the genetic backgrounds in the study are not themselves differentially sucrose-sensitive.

Table S3 – diet survey  
(data associated with Figure 3A)

| Food                               | scoring                                                   |            |                                                                 |             | ln(OR)         | confidence interval bounds |         |            |         | p-value           |
|------------------------------------|-----------------------------------------------------------|------------|-----------------------------------------------------------------|-------------|----------------|----------------------------|---------|------------|---------|-------------------|
|                                    | > RNAi <sup>dHHEX-V15721</sup><br>with tub <sub>p</sub> > |            | w <sup>1118</sup> genetic background<br>with tub <sub>p</sub> > |             |                | 95%                        |         | Bonferroni |         |                   |
|                                    | control                                                   |            | control                                                         |             |                | lower                      | upper   | lower      | upper   |                   |
| 0.15 M sucrose                     | <b>647</b>                                                | <b>725</b> | <b>1497</b>                                                     | <b>1526</b> | <b>-0.0946</b> | -0.2245                    | 0.0352  | -0.2836    | 0.0941  | <b>1.5196E-01</b> |
|                                    | 19                                                        | 12         | 295                                                             | 318         |                |                            |         |            |         |                   |
|                                    | 53                                                        | 84         | 382                                                             | 396         |                |                            |         |            |         |                   |
|                                    | 108                                                       | 103        | 76                                                              | 74          |                |                            |         |            |         |                   |
|                                    | 68                                                        | 90         | 78                                                              | 80          |                |                            |         |            |         |                   |
|                                    | 356                                                       | 383        | 71                                                              | 69          |                |                            |         |            |         |                   |
|                                    | 43                                                        | 53         | 105                                                             | 73          |                |                            |         |            |         |                   |
|                                    |                                                           |            | 95                                                              | 110         |                |                            |         |            |         |                   |
|                                    |                                                           |            | 194                                                             | 159         |                |                            |         |            |         |                   |
|                                    |                                                           |            | 109                                                             | 119         |                |                            |         |            |         |                   |
|                                    |                                                           |            | 92                                                              | 128         |                |                            |         |            |         |                   |
| 0.5 M sucrose                      | <b>42</b>                                                 | <b>83</b>  | <b>83</b>                                                       | <b>78</b>   | <b>-0.7407</b> | -1.2567                    | -0.2332 | -1.4862    | -0.0151 | <b>2.6870E-03</b> |
|                                    | 42                                                        | 83         | 83                                                              | 78          |                |                            |         |            |         |                   |
| 0.75 M sucrose                     | <b>3</b>                                                  | <b>10</b>  | <b>24</b>                                                       | <b>21</b>   | <b>-1.3152</b> | -3.1725                    | 0.2066  | -4.1229    | 0.7668  | <b>6.5918E-02</b> |
|                                    | 3                                                         | 10         | 24                                                              | 21          |                |                            |         |            |         |                   |
| 1.0 M sucrose                      | <b>9</b>                                                  | <b>263</b> | <b>261</b>                                                      | <b>278</b>  | <b>-3.3087</b> | -4.1234                    | -2.6238 | -4.5385    | -2.3728 | <b>3.7116E-46</b> |
|                                    | 7                                                         | 106        | 39                                                              | 39          |                |                            |         |            |         |                   |
|                                    | 1                                                         | 70         | 71                                                              | 64          |                |                            |         |            |         |                   |
|                                    | 1                                                         | 87         | 41                                                              | 49          |                |                            |         |            |         |                   |
|                                    |                                                           |            | 9                                                               | 13          |                |                            |         |            |         |                   |
|                                    |                                                           |            | 12                                                              | 14          |                |                            |         |            |         |                   |
|                                    |                                                           |            | 70                                                              | 76          |                |                            |         |            |         |                   |
|                                    |                                                           |            | 19                                                              | 23          |                |                            |         |            |         |                   |
| 0.15 M sucrose + 1.7 M glucose     | <b>0</b>                                                  | <b>62</b>  | <b>69</b>                                                       | <b>75</b>   | <b>-∞</b>      | -∞                         | -2.6482 | -∞         | -2.0831 | <b>3.6364E-14</b> |
|                                    | 0                                                         | 62         | 69                                                              | 75          |                |                            |         |            |         |                   |
| 0.15 M sucrose + 1.7 M fructose    | <b>0</b>                                                  | <b>119</b> | <b>108</b>                                                      | <b>98</b>   | <b>-∞</b>      | -∞                         | -3.5113 | -∞         | -2.9636 | <b>2.2245E-28</b> |
|                                    | 0                                                         | 119        | 108                                                             | 98          |                |                            |         |            |         |                   |
| 0.15 M sucrose + 0.1 M glucosamine | <b>0</b>                                                  | <b>100</b> | <b>27</b>                                                       | <b>55</b>   | <b>-∞</b>      | -∞                         | -2.4568 | -∞         | -1.8684 | <b>2.7095E-11</b> |
|                                    | 0                                                         | 100        | 27                                                              | 55          |                |                            |         |            |         |                   |

continued on next page

Table S3 – continued from previous page

| Food                                                 | scoring                                                   |            |                                                                 |            | ln(OR)         | confidence interval bounds |         |            |         | p-value           |
|------------------------------------------------------|-----------------------------------------------------------|------------|-----------------------------------------------------------------|------------|----------------|----------------------------|---------|------------|---------|-------------------|
|                                                      | > RNAi <sup>dHHEX-V15721</sup><br>with tub <sub>P</sub> > |            | w <sup>1118</sup> genetic background<br>with tub <sub>P</sub> > |            |                | 95%                        |         | Bonferroni |         |                   |
|                                                      | control                                                   |            | control                                                         |            |                | lower                      | upper   | lower      | upper   |                   |
| 0.15 M sucrose + 140 mg/mL fat                       | <b>226</b>                                                | <b>235</b> | <b>360</b>                                                      | <b>416</b> | <b>0.1054</b>  | -0.1321                    | 0.3430  | -0.2387    | 0.4497  | <b>3.7758E-01</b> |
|                                                      | 100                                                       | 107        | 115                                                             | 131        |                |                            |         |            |         |                   |
|                                                      | 56                                                        | 66         | 123                                                             | 146        |                |                            |         |            |         |                   |
|                                                      | 70                                                        | 62         | 122                                                             | 139        |                |                            |         |            |         |                   |
| 0.15 M sucrose + 0.5 M NaCl                          | <b>0</b>                                                  | <b>123</b> | <b>77</b>                                                       | <b>111</b> | -∞             | -∞                         | -3.0785 | -∞         | -2.5281 | <b>5.6924E-21</b> |
|                                                      | 0                                                         | 34         | 23                                                              | 25         |                |                            |         |            |         |                   |
|                                                      | 0                                                         | 31         | 26                                                              | 39         |                |                            |         |            |         |                   |
|                                                      | 0                                                         | 58         | 28                                                              | 47         |                |                            |         |            |         |                   |
| 0.15 M sucrose + 10 mM H <sub>2</sub> O <sub>2</sub> | <b>197</b>                                                | <b>285</b> | <b>258</b>                                                      | <b>296</b> | <b>-0.2317</b> | -0.4864                    | 0.0224  | -0.6009    | 0.1359  | <b>6.8937E-02</b> |
|                                                      | 35                                                        | 64         | 57                                                              | 54         |                |                            |         |            |         |                   |
|                                                      | 79                                                        | 102        | 57                                                              | 52         |                |                            |         |            |         |                   |
|                                                      | 83                                                        | 119        | 144                                                             | 190        |                |                            |         |            |         |                   |
| 0.15 M sucrose + 600 μM AgNO <sub>3</sub>            | <b>30</b>                                                 | <b>89</b>  | <b>46</b>                                                       | <b>63</b>  | <b>-0.7695</b> | -1.3759                    | -0.1744 | -1.6444    | 0.0792  | <b>7.6202E-03</b> |
|                                                      | 4                                                         | 24         | 9                                                               | 11         |                |                            |         |            |         |                   |
|                                                      | 6                                                         | 21         | 22                                                              | 30         |                |                            |         |            |         |                   |
|                                                      | 20                                                        | 44         | 15                                                              | 22         |                |                            |         |            |         |                   |
| 0.15 M sucrose, heat-shocked                         | <b>48</b>                                                 | <b>69</b>  | <b>65</b>                                                       | <b>75</b>  | <b>-0.2189</b> | -0.7468                    | 0.3058  | -0.9784    | 0.5334  | <b>4.4913E-01</b> |
|                                                      | 17                                                        | 22         | 27                                                              | 26         |                |                            |         |            |         |                   |
|                                                      | 12                                                        | 27         | 19                                                              | 28         |                |                            |         |            |         |                   |
|                                                      | 19                                                        | 20         | 19                                                              | 21         |                |                            |         |            |         |                   |

**Table S3. Diet survey. Ubiquitous dHHEX knockdown results in intolerance to sugar and salt but not other stressors.** Data associated with Figure 3A: survival to pupariation of progeny of UAS-RNAi<sup>dHHEX-V15721</sup> and w<sup>1118</sup> (genetic background control) males crossed to tub<sub>P</sub>-GAL4/TM6B unmated females, reared on different diets. In the “scoring” columns, bold numbers are total counts, and counts for individual trials are listed immediately underneath them.

Table S4 – driver survey, part 1  
(data associated with Figure 3B)

| Driver                           | crossed to        | stage      | scoring                  |                   |                |                | ln(OR)         | confidence interval bounds |         |            |                   | p-value           |               |            |           |                |         |                   |
|----------------------------------|-------------------|------------|--------------------------|-------------------|----------------|----------------|----------------|----------------------------|---------|------------|-------------------|-------------------|---------------|------------|-----------|----------------|---------|-------------------|
|                                  |                   |            | 1.0 M sucrose            |                   | 0.15 M sucrose |                |                | 95%                        |         | Bonferroni |                   |                   |               |            |           |                |         |                   |
|                                  |                   |            | RNAi                     | control           | RNAi           | control        |                | lower                      | upper   | lower      | upper             |                   |               |            |           |                |         |                   |
| tubp-GAL4                        | w <sup>1118</sup> | (pupae)    | <b>261</b>               | <b>278</b>        | <b>1497</b>    | <b>1526</b>    | <b>-0.0439</b> | -0.2317                    | 0.1437  | -0.3140    | 0.2257            | <b>6.4045E-01</b> |               |            |           |                |         |                   |
|                                  |                   |            | 39                       | 39                | 295            | 318            |                |                            |         |            |                   |                   |               |            |           |                |         |                   |
|                                  |                   |            | 71                       | 64                | 382            | 396            |                |                            |         |            |                   |                   |               |            |           |                |         |                   |
|                                  |                   |            | 41                       | 49                | 76             | 74             |                |                            |         |            |                   |                   |               |            |           |                |         |                   |
|                                  |                   |            | 9                        | 13                | 78             | 80             |                |                            |         |            |                   |                   |               |            |           |                |         |                   |
|                                  |                   |            | 12                       | 14                | 71             | 69             |                |                            |         |            |                   |                   |               |            |           |                |         |                   |
|                                  |                   |            | 70                       | 76                | 105            | 73             |                |                            |         |            |                   |                   |               |            |           |                |         |                   |
|                                  |                   |            | 19                       | 23                | 95             | 110            |                |                            |         |            |                   |                   |               |            |           |                |         |                   |
|                                  |                   |            |                          |                   | 194            | 159            |                |                            |         |            |                   |                   |               |            |           |                |         |                   |
|                                  |                   |            |                          |                   | 109            | 119            |                |                            |         |            |                   |                   |               |            |           |                |         |                   |
|                                  |                   | 92         | 128                      |                   |                |                |                |                            |         |            |                   |                   |               |            |           |                |         |                   |
| UAS-RNAi <sup>dHHEX-V15721</sup> | (pupae)           | <b>9</b>   | <b>263</b>               | <b>647</b>        | <b>725</b>     | <b>-3.2599</b> | -4.0624        | -2.5923                    | -4.4615 | -2.3568    | <b>2.1611E-52</b> |                   |               |            |           |                |         |                   |
|                                  |                   | 7          | 106                      | 19                | 12             |                |                |                            |         |            |                   |                   |               |            |           |                |         |                   |
|                                  |                   | 1          | 70                       | 53                | 84             |                |                |                            |         |            |                   |                   |               |            |           |                |         |                   |
|                                  |                   | 1          | 87                       | 108               | 103            |                |                |                            |         |            |                   |                   |               |            |           |                |         |                   |
|                                  |                   |            |                          | 68                | 90             |                |                |                            |         |            |                   |                   |               |            |           |                |         |                   |
|                                  |                   | 356        | 383                      |                   |                |                |                |                            |         |            |                   |                   |               |            |           |                |         |                   |
|                                  |                   | 43         | 53                       |                   |                |                |                |                            |         |            |                   |                   |               |            |           |                |         |                   |
| Dilp2-GAL4                       | w <sup>1118</sup> | (eclosers) | <b>649</b>               | <b>645</b>        | <b>823</b>     | <b>765</b>     | <b>-0.0669</b> | -0.2165                    | 0.0827  | -0.2823    | 0.1485            | <b>3.8894E-01</b> |               |            |           |                |         |                   |
|                                  |                   |            | 258                      | 271               | 347            | 310            |                |                            |         |            |                   |                   |               |            |           |                |         |                   |
|                                  |                   |            | 219                      | 203               | 260            | 267            |                |                            |         |            |                   |                   |               |            |           |                |         |                   |
|                                  |                   |            | 172                      | 171               | 216            | 188            |                |                            |         |            |                   |                   |               |            |           |                |         |                   |
|                                  |                   |            | <b>859</b>               | <b>822</b>        | <b>652</b>     | <b>672</b>     |                |                            |         |            |                   |                   | <b>0.0742</b> | -0.0725    | 0.2210    | -0.1370        | 0.2855  | <b>3.2122E-01</b> |
|                                  |                   |            | 155                      | 150               | 116            | 145            |                |                            |         |            |                   |                   |               |            |           |                |         |                   |
|                                  |                   |            | 410                      | 370               | 266            | 294            |                |                            |         |            |                   |                   |               |            |           |                |         |                   |
|                                  |                   |            | 294                      | 302               | 270            | 233            |                |                            |         |            |                   |                   |               |            |           |                |         |                   |
|                                  |                   |            |                          |                   |                |                |                |                            |         |            |                   |                   |               |            |           |                |         |                   |
|                                  |                   |            | Sns <sub>GCN</sub> -GAL4 | w <sup>1118</sup> | (pupae)        | <b>17</b>      |                |                            |         |            |                   |                   | <b>15</b>     | <b>114</b> | <b>98</b> | <b>-0.0260</b> | -0.8384 | 0.7954            |
| 17                               | 15                | 68         |                          |                   |                | 64             |                |                            |         |            |                   |                   |               |            |           |                |         |                   |
|                                  |                   | 46         |                          |                   |                | 34             |                |                            |         |            |                   |                   |               |            |           |                |         |                   |
| <b>44</b>                        | <b>24</b>         | <b>215</b> |                          |                   |                | <b>171</b>     | <b>0.3763</b>  | -0.1873                    | 0.9598  | -0.4189    | 1.2163            | <b>1.8523E-01</b> |               |            |           |                |         |                   |
| 27                               | 17                | 21         |                          |                   |                | 17             |                |                            |         |            |                   |                   |               |            |           |                |         |                   |
| 17                               | 7                 | 81         |                          |                   |                | 53             |                |                            |         |            |                   |                   |               |            |           |                |         |                   |
|                                  |                   | 46         |                          |                   |                | 36             |                |                            |         |            |                   |                   |               |            |           |                |         |                   |
|                                  |                   | 67         |                          |                   |                | 65             |                |                            |         |            |                   |                   |               |            |           |                |         |                   |

continued on next page



Table S4 – continued from previous page

| Driver     | crossed to                       | stage      | scoring                          |                                 |                                 |                                 | ln(OR)         | confidence interval bounds |         |            |         | p-value           |
|------------|----------------------------------|------------|----------------------------------|---------------------------------|---------------------------------|---------------------------------|----------------|----------------------------|---------|------------|---------|-------------------|
|            |                                  |            | 1.0 M sucrose                    |                                 | 0.15 M sucrose                  |                                 |                | 95%                        |         | Bonferroni |         |                   |
|            |                                  |            | RNAi                             | control                         | RNAi                            | control                         |                | lower                      | upper   | lower      | upper   |                   |
| byn-GAL4   | w <sup>1118</sup>                | (pupae)    | <b>88</b><br>88                  | <b>95</b><br>95                 | <b>99</b><br>99                 | <b>109</b><br>109               | <b>0.0196</b>  | -0.3977                    | 0.4369  | -0.5759    | 0.6151  | <b>1.0000E+00</b> |
|            | UAS-RNAi <sup>dHHEX-V15721</sup> | (pupae)    | <b>99</b><br>99                  | <b>91</b><br>91                 | <b>110</b><br>110               | <b>95</b><br>95                 | <b>-0.0622</b> | -0.4772                    | 0.3526  | -0.6547    | 0.5296  | <b>7.6324E-01</b> |
| MyoIA-GAL4 | w <sup>1118</sup>                | (eclosers) | <b>1022</b><br>343<br>351<br>328 | <b>691</b><br>229<br>259<br>203 | <b>779</b><br>309<br>193<br>277 | <b>695</b><br>275<br>156<br>264 | <b>0.2772</b>  | 0.1341                     | 0.4204  | 0.0712     | 0.4835  | <b>1.2528E-04</b> |
|            | UAS-RNAi <sup>dHHEX-V15721</sup> | (eclosers) | <b>360</b><br>167<br>102<br>91   | <b>374</b><br>162<br>104<br>108 | <b>368</b><br>54<br>157<br>157  | <b>507</b><br>50<br>244<br>213  | <b>0.2821</b>  | 0.0799                     | 0.4846  | -0.0083    | 0.5732  | <b>5.6701E-03</b> |
| esg-GAL4   | w <sup>1118</sup>                | (eclosers) | <b>948</b><br>326<br>289<br>333  | <b>623</b><br>187<br>221<br>215 | <b>630</b><br>257<br>160<br>213 | <b>468</b><br>150<br>133<br>185 | <b>0.1225</b>  | -0.0373                    | 0.2822  | -0.1075    | 0.3523  | <b>1.2855E-01</b> |
|            | UAS-RNAi <sup>dHHEX-V15721</sup> | (eclosers) | <b>8</b><br>2<br>6<br>0          | <b>192</b><br>68<br>99<br>25    | <b>150</b><br>43<br>64<br>43    | <b>224</b><br>55<br>112<br>57   | <b>-2.7734</b> | -3.6572                    | -2.0346 | -4.0945    | -1.7726 | <b>4.7473E-24</b> |

**Table S4. Driver survey, part 1. Knockdown of dHHEX in the tub<sub>P</sub> or esg domains results in sucrose intolerance.** Data associated with Figure 3B: survival of progeny of various drivers crossed to UAS-RNAi<sup>dHHEX</sup> or to w<sup>1118</sup> (genetic background control) on 0.15 M and 1.0 M sucrose. Pupariation was scored for tub<sub>P</sub>-GAL4, sns<sub>GCN</sub>-GAL4, and byn-GAL4; eclosion was scored for Dilp2-GAL4, MyoIA-GAL4, and esg-GAL4. In the “scoring” columns, bold numbers are total counts, and counts for individual trials are listed immediately underneath them.

Table S5 – driver survey, part 2  
(data associated with Figure 3C)

| Driver        | Stage      | scoring       |                |               |                | ln(OR)         | confidence interval bounds |         |            |         |                   | p-value |
|---------------|------------|---------------|----------------|---------------|----------------|----------------|----------------------------|---------|------------|---------|-------------------|---------|
|               |            | knockdown     |                | background    |                |                | 95%                        |         | Bonferroni |         |                   |         |
|               |            | 1.0 M sucrose | 0.15 M sucrose | 1.0 M sucrose | 0.15 M sucrose |                | lower                      | upper   | lower      | upper   |                   |         |
| Dot-GAL4      | (pupae)    | <b>164</b>    | <b>162</b>     | <b>169</b>    | <b>179</b>     | <b>0.0697</b>  | -0.2439                    | 0.3834  | -0.3792    | 0.5190  | <b>6.9997E-01</b> |         |
|               |            | 45            | 45             | 42            | 43             |                |                            |         |            |         |                   |         |
|               |            | 42            | 43             | 39            | 47             |                |                            |         |            |         |                   |         |
|               |            | 38            | 39             | 43            | 47             |                |                            |         |            |         |                   |         |
|               |            | 39            | 35             | 45            | 42             |                |                            |         |            |         |                   |         |
|               | (eclosers) | <b>43</b>     | <b>160</b>     | <b>168</b>    | <b>179</b>     | <b>-1.2484</b> | -1.6723                    | -0.8381 | -1.8603    | -0.6684 | <b>1.3922E-10</b> |         |
|               |            | 13            | 43             | 42            | 43             |                |                            |         |            |         |                   |         |
|               |            | 13            | 43             | 38            | 47             |                |                            |         |            |         |                   |         |
|               |            | 10            | 39             | 43            | 47             |                |                            |         |            |         |                   |         |
|               |            | 7             | 35             | 45            | 42             |                |                            |         |            |         |                   |         |
| Cg-GAL4       | (pupae)    | <b>219</b>    | <b>227</b>     | <b>259</b>    | <b>266</b>     | <b>-0.0092</b> | -0.2697                    | 0.2513  | -0.3829    | 0.3643  | <b>9.4874E-01</b> |         |
|               |            | 38            | 40             | 44            | 44             |                |                            |         |            |         |                   |         |
|               |            | 41            | 33             | 40            | 46             |                |                            |         |            |         |                   |         |
|               |            | 34            | 46             | 44            | 43             |                |                            |         |            |         |                   |         |
|               |            | 34            | 33             | 44            | 42             |                |                            |         |            |         |                   |         |
|               |            | 37            | 37             | 44            | 45             |                |                            |         |            |         |                   |         |
|               |            | 35            | 38             | 43            | 46             |                |                            |         |            |         |                   |         |
| srp.Hemo-GAL4 | (pupae)    | <b>106</b>    | <b>79</b>      | <b>42</b>     | <b>66</b>      | <b>0.7434</b>  | 0.2341                     | 1.2606  | 0.0215     | 1.4832  | <b>2.5370E-03</b> |         |
|               |            | 31            | 15             | 11            | 21             |                |                            |         |            |         |                   |         |
|               |            | 27            | 31             | 20            | 21             |                |                            |         |            |         |                   |         |
|               |            | 48            | 33             | 11            | 24             |                |                            |         |            |         |                   |         |
| GMH5          | (pupae)    | <b>102</b>    | <b>124</b>     | <b>129</b>    | <b>119</b>     | <b>-0.2754</b> | -0.6539                    | 0.1017  | -0.8168    | 0.2628  | <b>1.4185E-01</b> |         |
|               |            | 34            | 38             | 46            | 43             |                |                            |         |            |         |                   |         |
|               |            | 35            | 36             | 46            | 47             |                |                            |         |            |         |                   |         |
|               |            | 33            | 50             | 37            | 29             |                |                            |         |            |         |                   |         |

**Table S5. Driver survey, part 2. Knockdown of dHHEX in the Dot domain results in sucrose intolerance.** Data associated with Figure 3C: survival of progeny of various drivers crossed to UAS-RNAi<sup>dHHEX</sup> or to w<sup>1118</sup> (genetic background control) on 0.15 M and 1.0 M sucrose. Pupariation (for 50 embryos per trial) was scored for Dot-GAL4, Cg-GAL4, srp.Hemo-GAL4, and GMH5. Eclosion was also scored for Dot-GAL4. In the “scoring” columns, bold numbers are total counts, and counts for individual trials are listed immediately underneath them.

**Table S6 – circulating glucose**  
(data associated with Figure 4A)

| hemolymph glucose (mg/dL) |        |                          |  |
|---------------------------|--------|--------------------------|--|
| (control)                 |        | (experimental)           |  |
| 63.0                      | mean   | 71.1                     |  |
| 10.3                      | SD     | 13.3                     |  |
| 62.8                      | median | 71.7                     |  |
| 54.8-70.9                 | IQR    | 62.3-76.7                |  |
| 45.7-82.5                 | range  | 50.9-97.6                |  |
|                           |        | 97.6                     |  |
|                           |        | 96.4                     |  |
|                           |        | 91.6 93.0                |  |
|                           |        | 85.8                     |  |
| 82.5                      |        |                          |  |
|                           |        | 77.9                     |  |
| 76.7                      |        | 76.7                     |  |
| 73.2 73.4 73.4            |        | 74.0                     |  |
|                           |        | 71.7 71.7 72.1 72.9 73.0 |  |
| 67.4 68.6                 |        |                          |  |
| 65.1 66.2                 |        | 65.8 66.0                |  |
|                           |        | 63.9                     |  |
| 61.6 62.8                 |        | 61.6 62.3 62.5 62.8      |  |
| 59.3 60.2                 |        | 59.0 60.4                |  |
| 55.4                      |        |                          |  |
| 53.5 54.2                 |        | 54.0                     |  |
|                           |        | 52.9                     |  |
| 50.6                      |        | 50.9                     |  |
| 45.7 46.9                 |        |                          |  |

**Table S6. Cg>RNAi<sup>dHHEX-V15721</sup>, Dcr-2 larvae are hyperglycemic.**  
Data associated with Figure 4A. We measured hemolymph glucose of groups of 5–8 wandering third-instar females reared on 1.0 M sucrose food.

**Table S7 – body mass**  
(data associated with Figure 4B–C)

| per-animal mass (mg)                              |        |                          |                                                        |        |                                                        |  |
|---------------------------------------------------|--------|--------------------------|--------------------------------------------------------|--------|--------------------------------------------------------|--|
| (control)                                         | larvae | (experimental)           | (control)                                              | adults | (experimental)                                         |  |
| 1.42                                              | mean   | 1.32                     | 1.00                                                   | mean   | 0.85                                                   |  |
| 0.09                                              | SD     | 0.05                     | 0.09                                                   | SD     | 0.09                                                   |  |
| 1.42                                              | median | 1.31                     | 0.98                                                   | median | 0.83                                                   |  |
| 1.38-1.47                                         | IQR    | 1.28-1.38                | 0.93-1.07                                              | IQR    | 0.78-0.93                                              |  |
| 1.13-1.80                                         | range  | 1.23-1.39                | 0.81-1.22                                              | range  | 0.65-1.03                                              |  |
| 1.80                                              |        |                          |                                                        |        |                                                        |  |
| 1.54                                              |        |                          |                                                        |        |                                                        |  |
| 1.51 1.51 1.52 1.52 1.53                          |        |                          |                                                        |        |                                                        |  |
| 1.48 1.48 1.48 1.49 1.50 1.50                     |        |                          |                                                        |        |                                                        |  |
| 1.45 1.45 1.45 1.45 1.47 1.47 1.47 1.47           |        |                          |                                                        |        |                                                        |  |
| 1.43 1.43 1.43 1.43 1.43 1.43 1.44                |        |                          |                                                        |        |                                                        |  |
| 1.40 1.40 1.40 1.40 1.42 1.42 1.42 1.42 1.42      |        | 1.39                     |                                                        |        |                                                        |  |
| 1.36 1.38 1.38 1.38 1.38 1.38 1.39 1.39 1.39 1.39 |        | 1.38 1.38 1.38           |                                                        |        |                                                        |  |
|                                                   |        | 1.33 1.35                |                                                        |        |                                                        |  |
|                                                   |        | 1.33 1.33 1.34 1.34      |                                                        |        |                                                        |  |
|                                                   |        | 1.30 1.30 1.30 1.30 1.32 |                                                        |        |                                                        |  |
|                                                   |        | 1.27 1.28                |                                                        |        |                                                        |  |
|                                                   |        | 1.26                     |                                                        |        |                                                        |  |
|                                                   |        | 1.27                     |                                                        |        |                                                        |  |
|                                                   |        | 1.23                     |                                                        |        |                                                        |  |
|                                                   |        |                          | 1.22                                                   |        |                                                        |  |
|                                                   |        |                          | 1.19                                                   |        |                                                        |  |
|                                                   |        |                          | 1.16                                                   |        |                                                        |  |
|                                                   |        |                          | 1.12 1.13 1.14                                         |        |                                                        |  |
|                                                   |        |                          | 1.09 1.09 1.11                                         |        |                                                        |  |
|                                                   |        |                          | 1.06 1.06 1.06 1.07 1.07 1.07 1.07 1.07 1.08 1.08      |        |                                                        |  |
|                                                   |        |                          | 1.05 1.05                                              |        | 1.03                                                   |  |
|                                                   |        |                          | 1.00 1.00 1.01 1.01 1.02                               |        | 1.00 1.01                                              |  |
|                                                   |        |                          | 0.97 0.97 0.97 0.98 0.98 0.98 0.98 0.98                |        | 0.97 0.97 0.97 0.99 0.99                               |  |
|                                                   |        |                          | 0.94 0.94 0.95 0.96 0.96 0.96                          |        | 0.95 0.95 0.95 0.95 0.95                               |  |
|                                                   |        |                          | 0.91 0.91 0.91 0.91 0.92 0.92 0.92 0.92 0.92 0.93 0.93 |        | 0.91 0.91 0.92 0.93 0.93                               |  |
|                                                   |        |                          | 0.89 0.90                                              |        | 0.88 0.88 0.89 0.89                                    |  |
|                                                   |        |                          |                                                        |        | 0.85 0.86 0.86                                         |  |
|                                                   |        |                          |                                                        |        | 0.83 0.83 0.83 0.83                                    |  |
|                                                   |        |                          | 0.81 0.82                                              |        | 0.79 0.79 0.79 0.80 0.80 0.80 0.80 0.80 0.80 0.81 0.82 |  |
|                                                   |        |                          |                                                        |        | 0.76 0.77 0.77 0.77 0.78 0.78 0.78 0.78 0.78           |  |
|                                                   |        |                          |                                                        |        | 0.73                                                   |  |
|                                                   |        |                          |                                                        |        | 0.70                                                   |  |
|                                                   |        |                          |                                                        |        | 0.67 0.69                                              |  |
|                                                   |        |                          |                                                        |        | 0.65                                                   |  |

**Table S7. Cg>RNAi<sup>dHHEX-V15721</sup>, Dcr-2 flies have reduced body mass.** Data associated with Figure 4B–C. We measured mean per-animal mass of groups of 6–10 wandering third-instar and newly eclosed adult females reared on 1.0 M sucrose food.

**Table S8 – triglycerides**  
(data associated with Figure 4D–E)

| triglycerides (µg/mg tissue)        |        |                   |                         |        |                                     |  |
|-------------------------------------|--------|-------------------|-------------------------|--------|-------------------------------------|--|
| (control)                           | larvae | (experimental)    | (control)               | adults | (experimental)                      |  |
| 62.86                               | mean   | 51.11             | 53.24                   | mean   | 40.93                               |  |
| 12.32                               | SD     | 11.47             | 14.53                   | SD     | 8.09                                |  |
| 63.29                               | median | 48.65             | 50.72                   | median | 41.19                               |  |
| 52.59-70.27                         | IQR    | 42.76-61.78       | 45.38-57.01             | IQR    | 37.06-45.55                         |  |
| 31.81-88.92                         | range  | 34.35-67.69       | 38.46-101.71            | range  | 28.93-58.95                         |  |
|                                     |        |                   | 101.71                  |        |                                     |  |
| 88.92                               |        |                   |                         |        |                                     |  |
| 81.31 81.93                         |        |                   |                         |        |                                     |  |
| 76.16 77.33 77.50 78.19             |        |                   |                         |        |                                     |  |
| 74.01                               |        |                   |                         |        |                                     |  |
| 69.04 69.74 70.79                   |        |                   |                         |        |                                     |  |
| 64.74 64.78 65.85 66.80 66.95 67.40 |        | 64.55 65.93 67.69 |                         |        |                                     |  |
| 60.88 61.50 62.85 62.91 63.67       |        |                   | 60.17                   |        |                                     |  |
| 59.06 59.44 59.68                   |        | 59.00             | 56.14 56.97 57.06 58.35 |        | 58.95                               |  |
| 53.96 55.06                         |        | 55.20             | 52.81 53.39             |        |                                     |  |
| 48.34 49.37 50.27 51.08 51.22       |        | 50.27             | 48.64                   |        | 48.15 51.62 51.73                   |  |
| 45.32 47.17 47.88                   |        | 46.89 46.97 47.02 | 45.19 45.56 46.00 47.09 |        | 47.48                               |  |
|                                     |        |                   | 40.33 43.96             |        | 40.91 41.46 41.50 42.47 42.99 43.61 |  |
|                                     |        | 36.83 38.64       | 38.46                   |        | 36.56 37.55 37.80 38.32 39.76       |  |
|                                     |        | 34.35             |                         |        |                                     |  |
| 31.81                               |        |                   |                         |        | 28.93 29.23 29.28 30.23             |  |

**Table S8. *Cg>RNAi<sup>dHHEX-V15721</sup>*, *Dcr-2* flies have reduced triglyceride levels.** Data associated with Figure 4D–E. We measured mean whole-animal triglyceride levels (per mg tissue) for groups of 6–10 wandering third-instar and newly eclosed adult females reared on 1.0 M sucrose food.
